# Voltage- and Branch-specific Climbing Fiber Responses in Purkinje Cells

Yunliang Zang<sup>1</sup>, Stéphane Dieudonné<sup>2</sup> & Erik De Schutter<sup>1,3\*</sup>

<sup>1</sup>Computational Neuroscience Unit, Okinawa Institute of Science and Technology Graduate University,  
Okinawa 904-0495, Japan

<sup>2</sup>Inhibitory Transmission IBENS, CNRS UMR UMR8197, INSERM U1024, Ecole Normale  
Supérieure, 75005 Paris, France

<sup>3</sup>Lead Contact

\*Correspondence: erik@oist.jp

## Summary

Climbing fibers (CFs) provide instructive signals driving cerebellar learning, but mechanisms causing the variable CF responses in Purkinje cells (PCs) are not fully understood. Using a new experimentally validated PC model, we unveil the ionic mechanisms underlying CF-evoked distinct spike waveforms on different parts of the PC. We demonstrate that voltage can gate both the amplitude and the spatial range of CF-evoked  $\text{Ca}^{2+}$  influx by the availability of  $\text{K}^+$  currents. This makes the energy consumed during a complex spike (CS) also voltage-dependent. PC dendrites exhibit inhomogeneous excitability with individual branches as computational units for CF input. The variability of somatic CSs can be explained by voltage state, CF activation phase, and instantaneous CF firing rate. Concurrent clustered synaptic inputs affect CSs by modulating dendritic responses in a spatially precise way. The voltage- and branch-specific CF responses can increase dendritic computational capacity and enable PCs to actively integrate CF signals.

## Introduction

According to the Marr-Albus-Ito theory (Albus, 1971; Ito, 1972; Marr, 1969), climbing fiber (CF) inputs to Purkinje cells (PCs) carry movement error information and evoke cerebellar learning by depressing the strength of parallel fiber (PF) synaptic input. Recently, processing of CF-carried error information by PCs has become a focus of cerebellar research (Najafi et al., 2014; Yang and Lisberger, 2014), with increased attention to modifiable dendritic responses (Davie et al., 2008; Kitamura and Hausser, 2011; Najafi et al., 2014; Rokni et al., 2009). Unfortunately, the biophysical mechanisms underlying the voltage-related dendritic response amplitude are still unresolved. CF provides powerful synaptic input onto proximal dendrites, but  $\text{Ca}^{2+}$  influx in distal dendrites is found to be unreliable (Ohtsuki et al., 2012; Otsu et al., 2014; Zagha et al., 2010). The pattern of dendritic spike initiation and propagation is important because the spatial range of  $\text{Ca}^{2+}$  influx controls the dendritic sites undergoing synaptic plasticity and even the direction of cerebellar learning. Moreover, whether individual branches of PC dendritic trees are homogeneously excitable has never been investigated due to technical limitations. The effect of clustered PF synaptic input (Wilms and Hausser, 2015) on CF-evoked dendritic responses is also unknown. The answers to these questions will determine whether the computational unit of CF responses is the entire dendritic tree or individual branches.

Somatic complex spikes (CSs) were assumed to be a result of synaptic input current and somatic ionic currents (Schmolesky et al., 2002). Observations that dendritic spike variation plays a minimal role in evoking an extra somatic spikelet seemed to confirm this assumption (Davie et al., 2008), however, contrary observations exist (Ohtsuki et al., 2012; Otsu et al., 2014). Somatic CSs are quite variable (Burroughs et al., 2017;

49 Warnaar et al., 2015) and their durations have been linked with the degree of trial-over-  
50 trail learning (Yang and Lisberger, 2014). Voltage states or simple spike firing rates  
51 (SSFRs) (well known to represent voltage states *in vitro* and recently demonstrated *in*  
52 *vivo* (Jelitai et al., 2016)) have been correlated with CS spikelet numbers in some  
53 studies (Burroughs et al., 2017; Gilbert, 1976; Khaliq and Raman, 2005; Monsivais et  
54 al., 2005), but not in others (Mano, 1970; Warnaar et al., 2015). Additionally, CSs can  
55 be modulated by CF FRs (Hansel and Linden, 2000), but contradictory correlations  
56 between spikelet numbers and the instantaneous CF FRs have been reported (Burroughs  
57 et al., 2017; Khaliq and Raman, 2005; Maruta et al., 2007; Warnaar et al., 2015). Thus,  
58 it is necessary to re-examine how the CS shape is regulated.

59 Spiking is energetically expensive (Attwell and Laughlin, 2001). Each CS consumes  
60 more energy than a SS, but neither can be measured experimentally.

61 To address these questions, a systematic exploration of CF responses with high  
62 spatio-temporal resolution is required. Given the difficulty of simultaneously recording  
63 at numerous locations in the same cell by patch-clamp (Davie et al., 2008; Stuart and  
64 Hausser, 1994) and the lack of direct spike information from  $Ca^{2+}$  imaging (Deneux et  
65 al., 2016), computer models can play an indispensable role. Here we have built a  
66 ‘canonical’ PC model that reproduces most available experimental observations instead  
67 of fitting it to a specific cell recording. We use this model to systematically explore  
68 factors that affect CF-evoked dendritic and somatic responses and estimate the energy  
69 consumed for SSs and CSs.

## 70 **Results**

### 71 **Electrophysiological properties of SSs**

72 Before using the model to make predictions, we first compare its basic properties with  
73 *in vitro* experimental data. Example cell recordings are shown in Fig. 1A-D to help the  
74 comparison. Our PC model spontaneously fires at 40 Hz in the absence of synaptic  
75 inputs or current injections (27 to 140 Hz in experiments). SSs initiate first at the axon  
76 initial segment (AIS) with an axosomatic delay of 0.12 ms ( $\sim 0.1$  ms reported by Palmer  
77 et al. (2010)). The SS peak is -1 mV and its amplitude is 68 mV (-11 to -3 mV and 56  
78 to 68 mV respectively in experiments). SSs have a half-amplitude duration of 0.22 ms  
79 (0.22 to 0.28 ms in experiments). The peak  $dv/dt$  of SSs is 530 mV/ms (440 to 540  
80 mV/ms in experiments). The  $d^2v/dt^2$  of SSs shows a biphasic increase, with the first  
81 component reflecting the contribution of axial current from the AIS and the second one  
82 reflecting the contribution of somatic  $Na^+$  current. The peak value of  $d^2v/dt^2$  is 6600  
83  $mV/ms^2$  (5600 to 8200  $mV/ms^2$  in experiments).

84 Due to the absence of dendritic  $Na^+$  channels (Stuart and Hausser, 1994) and the  
85 large impedance load of elaborate dendritic trees (Vetter et al., 2001), SSs fail to invade  
86 the dendritic tree (Llinas and Sugimori, 1980). The distance-dependent decay of SS  
87 amplitudes in the model matches experimental data (Fig. 1E; also close to Stuart and  
88 Hausser (1994)). The model also performs well in response to somatic current  
89 injections. The F-I curve falls within the experimentally measured range (Fig. 1F).  
90 Similar with Fernandez et al. (2007), our model has type-I excitability. When a large  
91 enough negative current is injected, the cell is silenced and shows a typical ‘sag’  
92 response (illustrated in the inset of Fig. 1G). Both the peak and steady state of the ‘sag’  
93 response are within the range of experimental data (Fig. 1G).

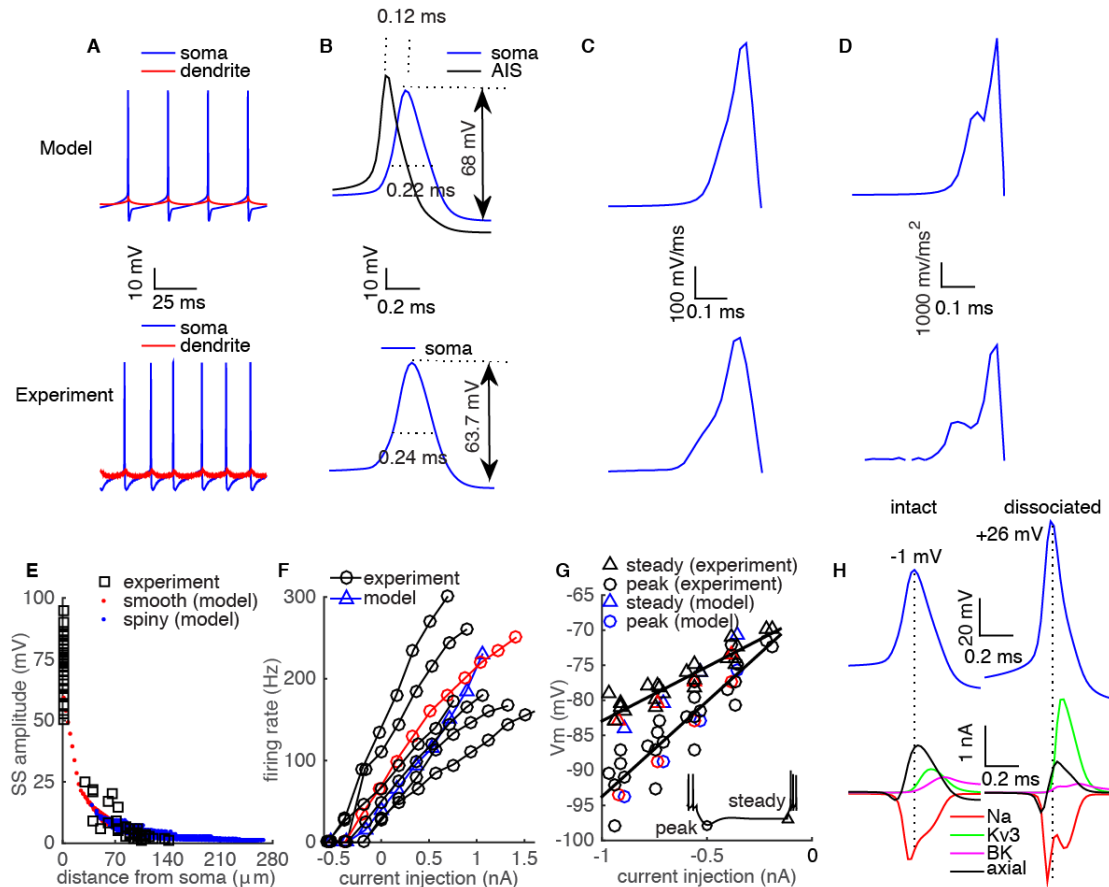

94

95 **Figure 1. Model properties compare well with experimental data.**

96 **A.** Spontaneously firing SSs and dendritic membrane potentials (103  $\mu\text{m}$  from soma) from the model and  
 97 experiments (dendritic site is  $\sim 100 \mu\text{m}$  from soma). **B.** A single SS from the model and experiments.  
 98 The spike at the AIS is aligned to measure the axosomatic delay in the model. The  $dv/dt$  and  $d^2v/dt^2$   
 99 of the SS in the model are compared with experimental data in **C** and **D** separately. **E.** Distance-dependent  
 100 decay of SS amplitudes in the model and experimental data (Ohtsuki et al. (2012)). **F.** The F-I curve of  
 101 the model compared with experimental data. **G.** The peak and steady state values of 'sag' responses  
 102 caused by negative current injections are compared between model and experimental data. In F-G, red  
 103 symbols are from the example cell used in A-D. The data used in A-D, F-G are from Rancz and Hausser  
 104 (2010). **H.** Distinct spike peaks and principal ionic current profiles in the intact and the dissociated PC  
 105 model. In the dissociated PC, only the dendritic root section before the first bifurcation is preserved.  
 106 Ionic currents are computed at the central segment (surface area of 204  $\mu\text{m}^2$ ) of the soma.

107

108 This good overall performance in response to current injections suggests that the model  
 109 is reliable in predicting excitatory and inhibitory synaptic responses in PCs.

110 Dissociated PCs are often used to investigate the role of ionic currents in PC  
 111 electrophysiological properties (Carter and Bean, 2009; Khaliq et al., 2003; Swensen  
 112 and Bean, 2003). However, we find the profiles of  $\text{Na}^+$  current (principal depolarization  
 113 current (Carter and Bean, 2009)) and of Kv3 current (principal repolarization current  
 114 (Martina et al., 2007)) in an intact PC strongly differ from in a dissociated PC owing to  
 115 their distinct spike properties (Fig. 1H). Similar with Bekkers and Hausser (2007), the  
 116 intact PC model exhibits a higher spike threshold, smaller afterhyperpolarization and  
 117 lower spike peak compared with the dissociated PC. The lower spike peak (-1 mV in  
 118 the model) compared with the dissociated PC (+26 mV in the model, +32 mV in Carter  
 119 and Bean (2011) and  $\sim +40$  mV in Bekkers and Hausser (2007)) leads to a much smaller  
 120 fraction of Kv3 channels activated, due to their high activation threshold (Martina et  
 121 al., 2007). In the intact PC, the dendrite repolarizes somatic SSs together with the 'less'  
 122 activated Kv3 current. This large axial current (flow into dendrite) keeps pace with SS

123 depolarization to constrain its peak to -1 mV (a smaller axial current exists in the  
124 dissociated PC due to the remaining dendritic stump). At the peak of the spike, the ‘dip’  
125 in the Na<sup>+</sup> current observed in dissociated PCs (Carter and Bean, 2009) is absent in the  
126 intact PC model.

127 The Na<sup>+</sup> entry ratio (the ratio of total Na<sup>+</sup> influx to the Na<sup>+</sup> influx during the rising  
128 phase (Carter and Bean, 2009)) can decrease from 3.0 in the dissociated PC model to  
129 2.2 in the intact PC model. Although dendrites lack Na<sup>+</sup> channels, SSs passively  
130 propagate into dendrites and partially activate Ca<sup>2+</sup> channels in proximal dendrites.  
131 Therefore, we compute the ATP molecules required for each SS to better understand  
132 their energy consumption (Attwell and Laughlin, 2001). In our model,  $4.3 \times 10^7$  ATP  
133 molecules are required to pump Na<sup>+</sup> ions and Ca<sup>2+</sup> ions out of the PC after a SS, with  
134 60% of the energy expended on Na<sup>+</sup> ions.

### 135 **CF responses in the PC**

136 When PCs receive synaptic inputs from CFs, stereotypical CSs occur at their somas.  
137 CF responses at different sites of a spontaneously firing PC model are shown in Fig.  
138 2A. The peak  $dv/dt$  of the first spikelet in the CS is  $\sim 270$  mV/ms larger than that of the  
139 SS, as confirmed by *in vitro* experimental data (Fig. 2B). The large peak  $dv/dt$  of the  
140 first spikelet ensures its reliable propagation down to the cerebellar nuclei (CN) (Khaliq  
141 and Raman, 2005; Monsivais et al., 2005). The CS still initiates first at the AIS (Palmer  
142 et al., 2010) with an axosomatic delay of the first spikelet of 0.06 ms, which is much  
143 shorter than that of the SS (Fig. 2C). This decreased axosomatic delay is caused by the  
144 depolarizing CF EPSC during the initial depolarization phase (Fig. 2D). The model also  
145 replicates varied CF responses due to bursting CF input (Mathy et al., 2009) (Fig. S1).

146 In agreement with previous experimental findings (Swensen and Bean, 2003), the  
147 SK2 current terminates the CS (Fig. 2D). Each spikelet of the somatic CS in our model,  
148 except the last one, is sharp (Fig. 2A), suggesting they are generated by Na<sup>+</sup> channels  
149 (Fig. 2D). Two factors determine the absence of Ca<sup>2+</sup> spikes at the soma. First, the P-  
150 type Ca<sup>2+</sup> current is much smaller than the Na<sup>+</sup> current; therefore, the Na<sup>+</sup> current shunts  
151 it. Second, K<sup>+</sup> currents are always larger than the P-type Ca<sup>2+</sup> current (Fig. 2D).  
152 Magnitudes of the CF EPSC and the net axial current are comparable to somatic ionic  
153 currents (Fig. 2D), suggesting an important role in generating somatic CSs.  
154 Consequently, a variation of either CF EPSC or axial current has the potential to alter  
155 somatic CSs, as shown in later sections.

156 The dendritic root section (the section between the soma and the first dendritic  
157 bifurcation) is electrically compact with the soma and shows mainly a passive  
158 propagation of a somatic CS. With distance from the soma, the clamping effect of the  
159 somatic CS on the dendrite weakens. The P-type Ca<sup>2+</sup> current gradually dominates and  
160 cause Ca<sup>2+</sup>-driven dendritic responses in the PC dendrite (Fig. 2A, E-F).

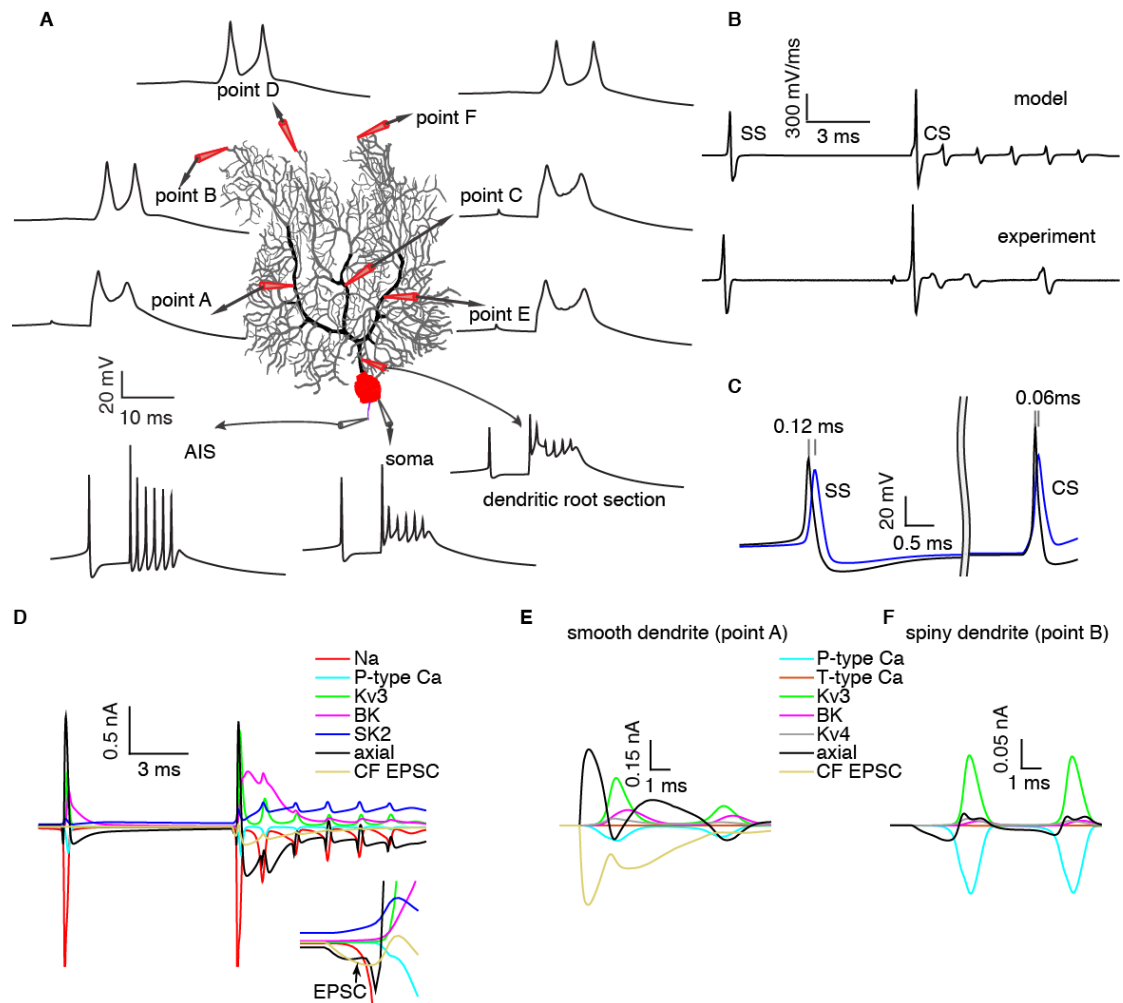

161  
162  
163  
164  
165  
166  
167  
168  
169  
170  
171  
172  
173

**Figure 2. The generation of CF responses in the PC.**

**A.** CF responses at different sites in the PC model. Two sites on each main branch are selected. Points A (smooth dendrite) and B (spiny dendrite) on branch 1; Points C and D on branch 2; Points E and F on branch 3. CF responses at dendritic root section, soma and AIS are labeled by corresponding arrows. **B.** The peak  $dv/dt$  of the first CS spikelet increases compared with a SS in both model and experiment (Warnaar et al. (2015)). **C.** The axosomatic delay of the first spikelet in the CS decreases compared with a SS. **D.** The composition of the somatic CS. Currents at the initial depolarization phase are enlarged in the inset. Dendritic currents at points A and B are shown in **E** and **F** in sequence. The surface areas of the segments chosen at the soma, point A and point B are  $204 \mu\text{m}^2$ ,  $64 \mu\text{m}^2$ , and  $23 \mu\text{m}^2$ , respectively. CF EPSC is absent in the spiny dendrite. Notice different scales used in D-F due to different segment surface areas.

**174 Factors regulating the initiation and propagation of dendritic spikes**

175 Here we systematically explore how different voltage states, caused by varying the  
176 somatic holding current, regulate CF-evoked dendritic responses and analyze the  
177 biophysical mechanisms. We find depolarization facilitates higher peaks of dendritic

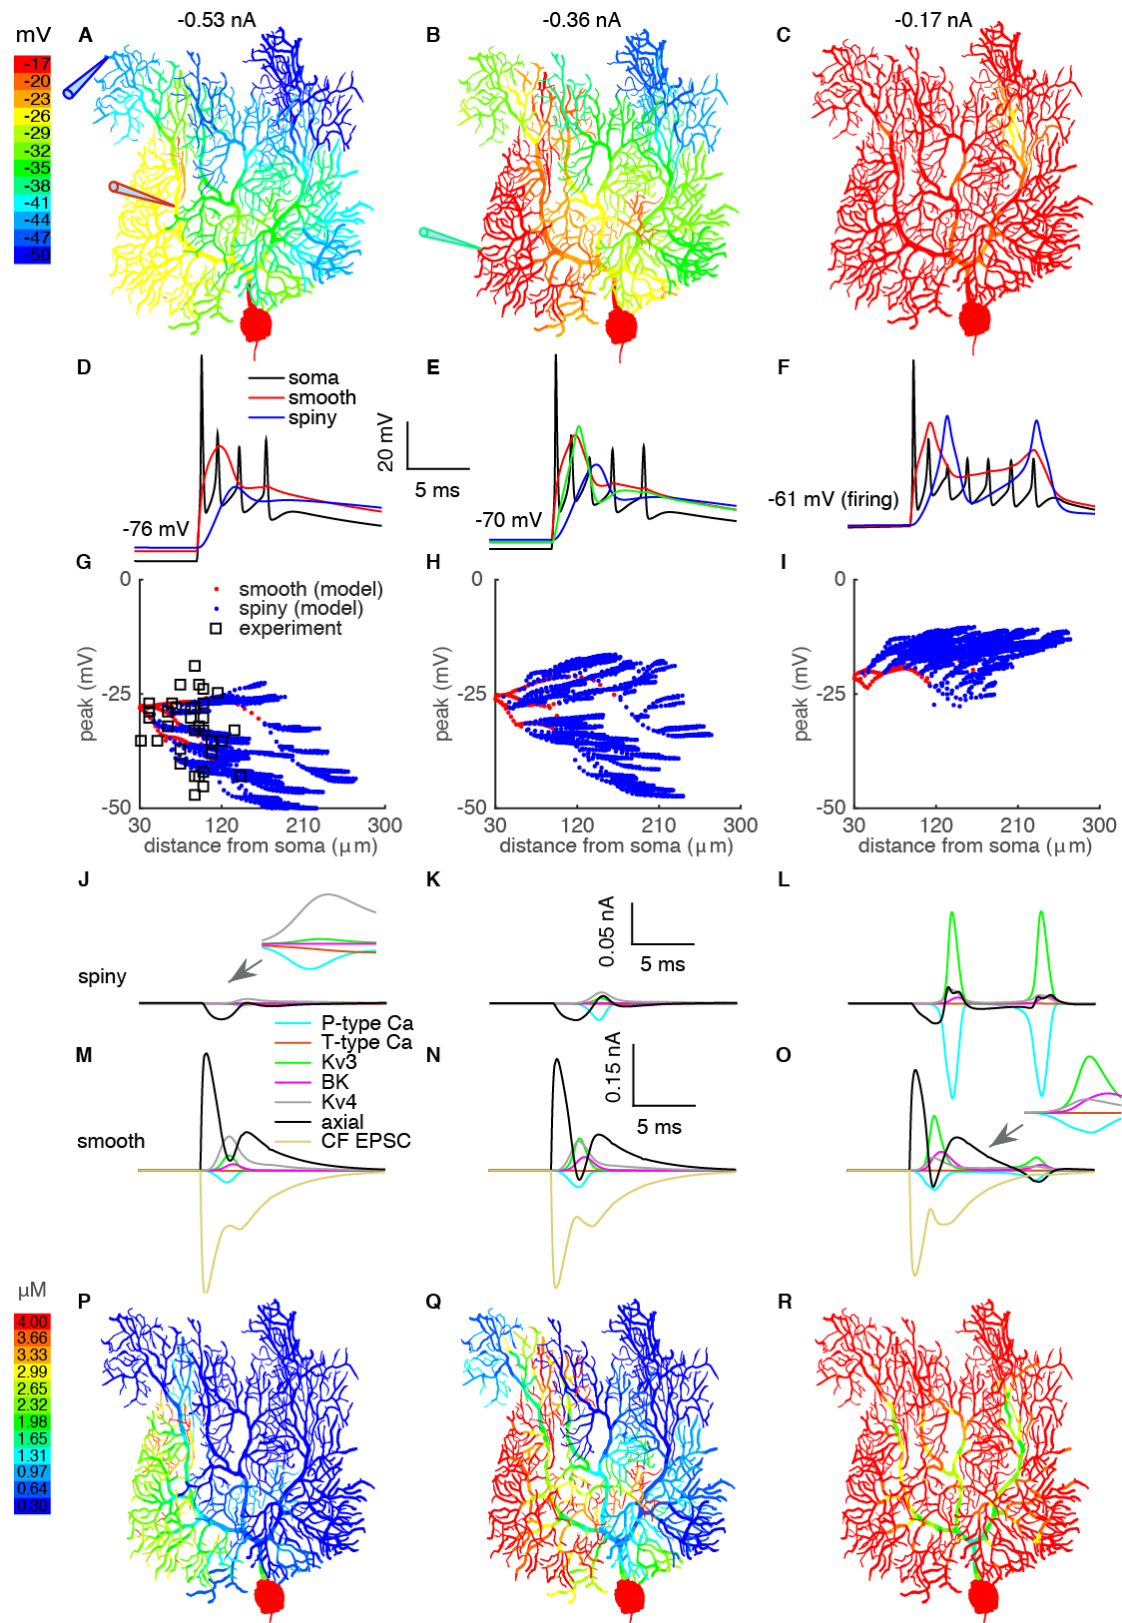

178  
179  
180  
181  
182  
183  
184

**Figure 3. Voltage states regulate CF-evoked dendritic spike generation and propagation.**

From left to right column, the holding potentials are -76 mV, -70 mV and -60 mV, respectively. **A-C.** Color-coded voltage responses. **D-F.** Somatic CSs, voltage responses on the smooth dendrite and spiny dendrite. In **E**, an extra example voltage response (green trace, position indicated in **B**) on the spiny dendrite is shown. **G-I.** Distance-dependent propagation of voltage responses. Experimental data in **G** are from Ohtsuki et al. (2012). **J-L** and **M-O** show ionic currents in the spiny dendrite and smooth

185 dendrite respectively. The surface areas of the segments chosen at the smooth dendrite and spiny dendrite  
186 are  $64 \mu\text{m}^2$  and  $23 \mu\text{m}^2$  respectively. **P-R.** Color-coded  $\text{Ca}^{2+}$  concentrations.

187

188 responses with further propagation into distal spiny dendrites. In distal spiny dendrites,  
189 axial currents from proximal smooth dendrites are the only current sources that can  
190 depolarize to approach the  $\text{Ca}^{2+}$  spike threshold and trigger a dendritic spike (Fig. 3J-  
191 L). When the soma is held at  $-76 \text{ mV}$  (Fig. 3A), the A-type  $\text{Kv4}$  current is larger than  
192 the P-type  $\text{Ca}^{2+}$  current in spiny dendrites (Fig. 3J). Consequently, axial currents cause  
193 only small passive depolarizations in spiny dendrites (Fig. 3D), and P-type  $\text{Ca}^{2+}$   
194 channels are hardly activated (Fig. 3J). In smooth dendrites, the CF provides powerful  
195 synaptic input to depolarize (Fig. 3D). However, this depolarization is still passive  
196 because the  $\text{Kv4}$  current and axial currents (flow into distal parts) stop the P-type  $\text{Ca}^{2+}$   
197 current from dominating depolarization (Fig. 3M). Accordingly, the dendritic voltage  
198 responses decrease with distance from the soma in the whole dendrite (Fig. 3G).  
199 Distance-dependent propagation of voltage responses matches experimental recordings  
200 under the same conditions (Fig. 3G). As the soma is held at  $-70 \text{ mV}$  (Fig. 3B), dendritic  
201 spikes occur in part of the dendritic tree (the left half, proximal to the soma), where the  
202 voltage responses now increase with distance from the soma. However, the responses  
203 still decay with distance from the soma in other parts of the dendritic tree (Fig. 3B,E,H).  
204 With depolarization of the soma to  $-61 \text{ mV}$  (Fig. 3C), the  $\text{Kv4}$  current gradually  
205 inactivates and becomes smaller than the P-type  $\text{Ca}^{2+}$  current in both smooth and spiny  
206 dendrites during the initial depolarization phase (Fig. 3L,O). As a result, the P-type  
207  $\text{Ca}^{2+}$  current depolarizes the dendrites and activates more  $\text{Ca}^{2+}$  channels in a positive  
208 feedback loop until the  $\text{Kv3}$  current is highly activated to repolarize the spikes.  
209 Dendritic spikes occur globally and their peaks increase with distance from the soma  
210 (Fig. 3F,I). In line with voltage responses, the dendritic  $\text{Ca}^{2+}$  influx is also facilitated  
211 by depolarization, causing larger and more widespread elevations in dendritic  $\text{Ca}^{2+}$   
212 concentration (Fig. 3P-R). Additional CF responses at other voltage states are shown in  
213 Fig. S2.

214 The critical role of  $\text{Kv4}$  current in regulating dendritic spike propagation is further  
215 demonstrated in Fig. S3. After blocking dendritic  $\text{Kv4}$  current, dendritic spikes reliably  
216 propagate to the whole dendrite at more hyperpolarized conditions. We further test  
217 whether other  $\text{K}^+$  currents regulate the propagation of CF-evoked dendritic response.  
218 Blocking the high threshold-activated  $\text{Kv3}$  current surprisingly facilitates the  
219 propagation of dendritic spikes (Fig. S4) (Otsu et al., 2014; Zagha et al., 2010). Unlike  
220 the ‘brake’ mechanism of  $\text{Kv4}$  current, dendritic  $\text{Kv3}$  current mainly narrows the CF  
221 response and only activates when the response is large enough (Fig. 3 J-O). Blocking  
222 the  $\text{Kv3}$  current broadens the dendritic responses at smooth dendrites and facilitates  
223 their propagation to spiny dendrites. The effect of broadening dendritic responses on  
224 their propagation is further demonstrated in Fig. S5. Dendritic BK current does not  
225 significantly affect the propagation of CF-evoked dendritic responses (data not shown).

226 Taken together, these results suggest that availability of dendritic  $\text{K}^+$  channels not  
227 only regulates the amplitude (Kitamura and Hausser, 2011; Rokni et al., 2009) but also  
228 gates the spatial range of  $\text{Ca}^{2+}$  influx (Ohtsuki et al., 2012; Otsu et al., 2014; Zagha et  
229 al., 2010). Voltage conditions can also explain the distinct dendritic spike waveforms  
230 recorded *in vitro* by different groups (Davie et al., 2008; Ohtsuki et al., 2012) in Fig.  
231 S6.

### 232 **Inhomogeneous excitability of the dendritic tree**

233 Similar to the first dendritic spikelet (Fig. 3B), the secondary dendritic spikelet occurs  
234 asynchronously in different branches around its threshold (Fig. 4). It initially occurs at

235 branch 1; then it gradually occurs at branch 2 and finally occurs at branch 3 with slightly  
236 increasing depolarization. Even when secondary dendritic spikelets occur globally,  
237 their time to peak still differs between branches (Fig. 4C). They peak at 8.36 ms, 10.74  
238 ms and 13.64 ms at points A, C and E respectively (relative to CF activation time). With  
239 further depolarization, secondary dendritic spikelets peak more synchronously (with  
240 0.89 nA current injection, the respective values become 6.06 ms, 6.88 ms and 7.32 ms).  
241 The asynchronous occurrence of individual spikelets reflects the inhomogeneous  
242 excitability of each dendritic branch. In the model, the density of ionic currents is  
243 homogeneous in the spiny dendritic tree. Therefore, morphological differences between  
244 individual branches may account for heterogeneous excitability. The excitability of  
245 each branch is determined by the ratio of spiny dendrite area to smooth dendrite length  
246 in that branch (essentially the ratio of spiny dendrite capacitance load to CF synaptic  
247 input, ‘load/input’ ratio, see Methods). The ‘load/input’ ratios are 69, 96 and 130 at  
248 branches 1, 2 and 3 respectively, explaining their heterogeneous excitability. Moreover,  
249 within each ‘big’ branch, ‘small’ child branchlets also show heterogeneity  
250

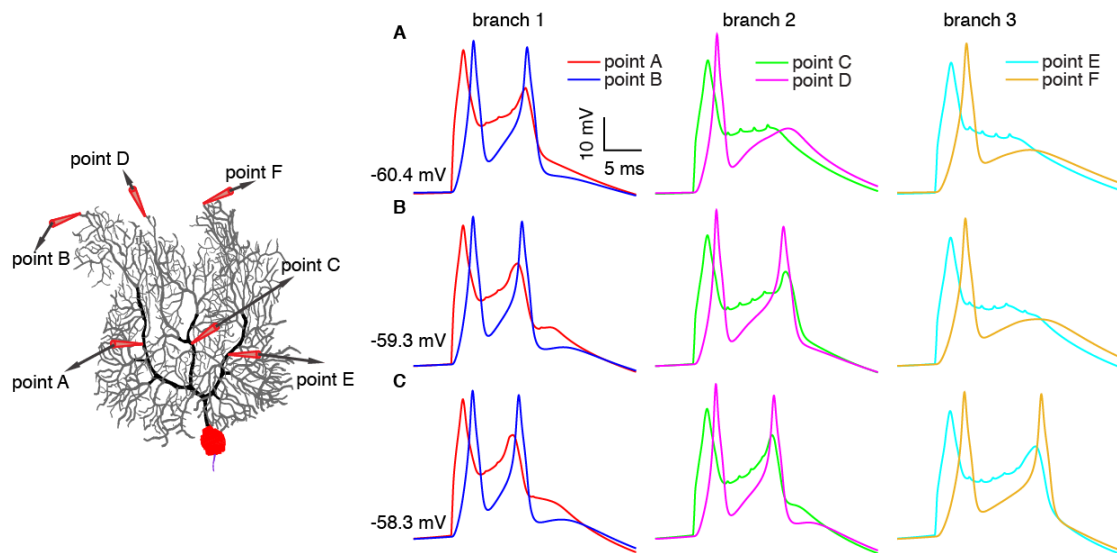

251  
252

253 **Figure 4. Branch-specific occurrence of secondary dendritic spikelets.**

254 In all simulations, the holding current is -0.17 nA. CF input is activated at three slightly different dendritic  
255 voltage states (different phases of somatic interspike intervals) as shown in **A**, **B**, and **C**.

256

257 in excitability (Fig. 3A-C), which are caused by other morphological factors such as  
258 the electrotonic distance to smooth dendrites.

259  $K^+$  currents activated near ‘resting’ dendritic membrane potentials may enhance the  
260 heterogeneous excitability. The whole dendrite becomes more homogeneous at  
261 hyperpolarized levels after blocking the Kv4 current (Fig. S3). Essentially, uneven  
262 distributed ‘load/input’ ratios underlie the heterogeneous dendritic excitability, but  
263 dendritic Kv4 channels enhance it.



## 264 Voltage- and phase-dependent somatic CSs

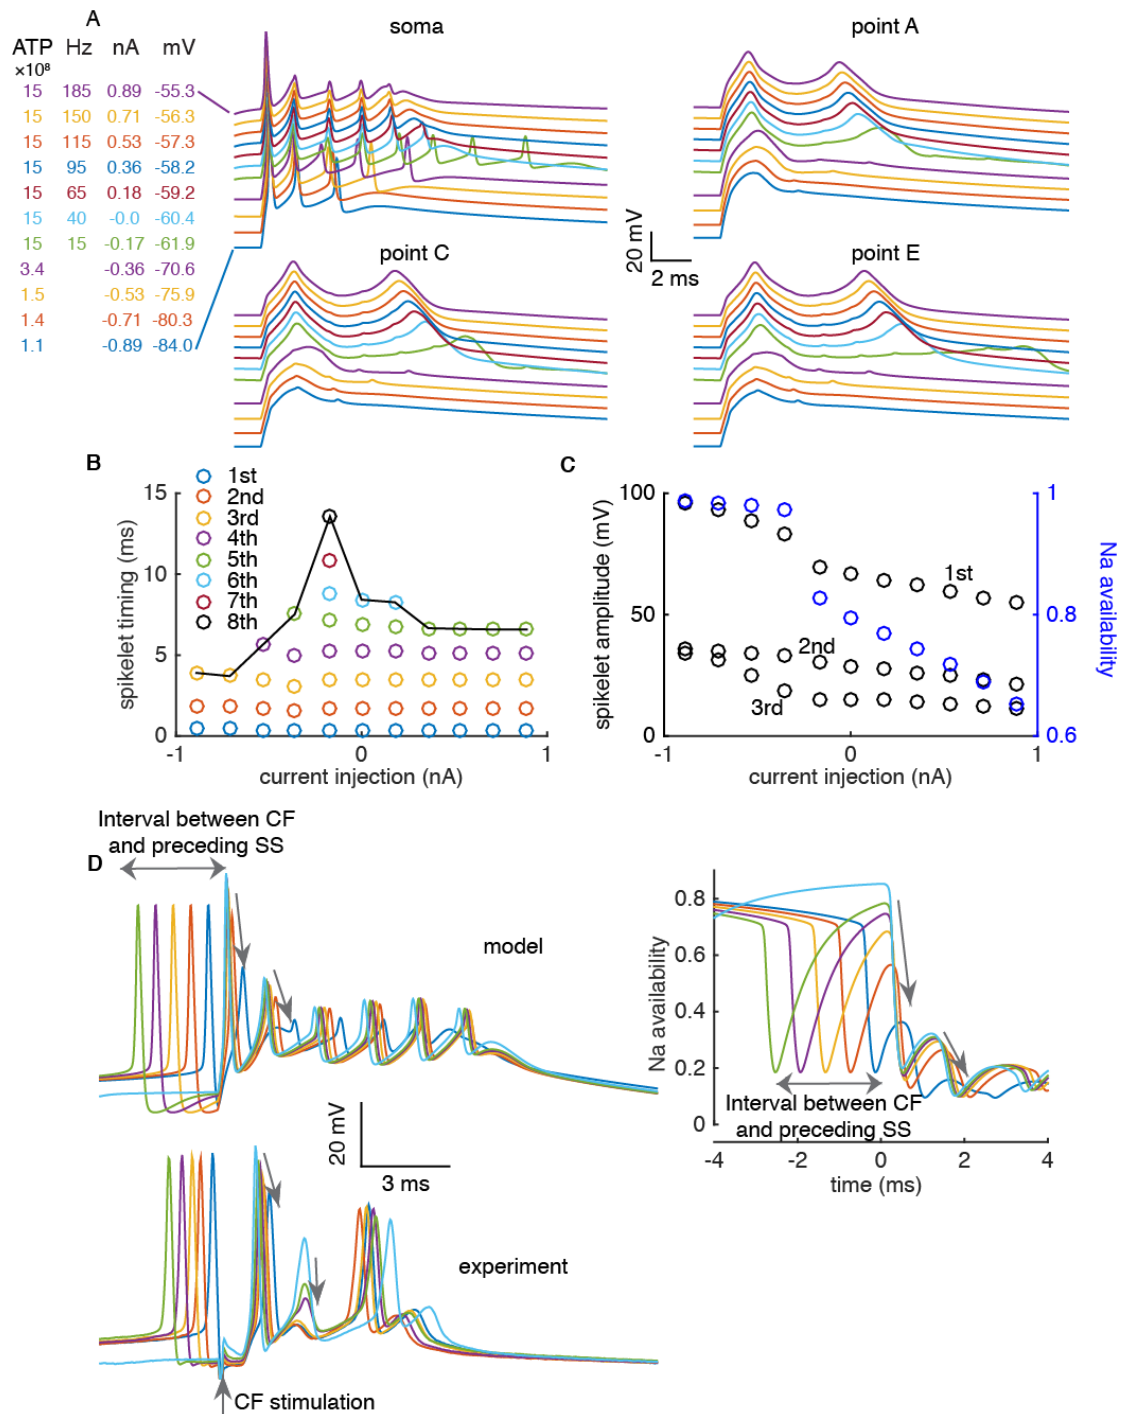

265  
266 **Figure 5. Voltage- and phase-dependent somatic CSs.**

267 A. Voltage states affect somatic CSs and corresponding dendritic responses. The definition of dendritic  
268 sites is the same as in Fig. 2. The holding currents, the FRs and the consumed ATP molecules at each  
269 voltage state are listed on the left. B. Voltage states modulate CS durations, represented by the timing of  
270 the last spikelets. C. In parallel with  $\text{Na}^+$  channels availability (blue circles), amplitudes of the first three  
271 spikelets in the CS (black circles) decrease with depolarization. D. Amplitudes of the first and second  
272 spikelets are phase-dependent in model and experiments (Warnaar et al. (2015)). Phase-dependent  
273 recovery of  $\text{Na}^+$  channels is shown in upper right panel.

274 Similar with dendritic responses, somatic CSs also vary significantly with  
275 depolarization (Fig. 5A-C). The spikelet numbers in CSs increase with initial  
276 depolarization, but decrease with further depolarization. A somatic CS results from the

277 interaction of intrinsic ionic currents, axial current, and CF EPSC (Fig. 2D). At low  
278 voltage, although Na<sup>+</sup> channel availability decreases slightly (Fig. 5C), increased axial  
279 current from larger dendritic responses (Fig. 5A) dominates and triggers more somatic  
280 spikelets. Interestingly, the largest number of somatic spikelets coincides with the  
281 longest occurrence latency of secondary dendritic spikelets (Fig. 5A). With further  
282 depolarization, Na<sup>+</sup> channel availability decreases at a higher rate (Fig. 5C). Also,  
283 secondary dendritic spikelets peak faster and closer to a preceding somatic spikelet (Fig.  
284 5A). The shortened interval between secondary dendritic spikelets and their preceding  
285 somatic spikelet means fewer Na<sup>+</sup> channels are recovered to evoke an extra somatic  
286 spikelet (right axis of Fig. 5D). The critical role of secondary dendritic spikelet timing  
287 in evoking an extra somatic spikelet agrees with previous experimental observations  
288 (Davie et al., 2008). Both factors decrease somatic spikelets with further depolarization.  
289 Concurrent with spikelet numbers, CS durations are regulated by voltage states, as  
290 represented by the timing of the last spikelets (Fig. 5B).

291 With depolarization, the consumed ATP molecules during CSs increase from  
292  $1.1 \times 10^8$  (-84 mV) to  $1.5 \times 10^9$  for a CS with two dendritic spikelets (nearly 40 times as  
293 large as in a SS), with 96% of the energy expended on Ca<sup>2+</sup> ions (Fig. 5A). The increased  
294 ATP consumption with depolarization is due to increased Ca<sup>2+</sup> influx (Fig. 3, 5A, S2),  
295 but relatively insensitive to somatic spikelet variations.

296 Voltage states also affect spikelet amplitudes in CSs. We analyzed the first three  
297 spikelets, which exist in all simulated voltage conditions. Spikelet amplitudes decrease  
298 with depolarization due to reduced availability of Na<sup>+</sup> channels (Fig. 5C). Individual  
299 spikelet amplitude is critical because it determines the probability of propagation down  
300 to the CN (Khaliq and Raman, 2005; Monsivais et al., 2005).

301 Finally, we observed phase-dependency of somatic CSs. Amplitudes of the first two  
302 spikelets in CSs decrease and the spikelets become more blunted with shortening of the  
303 interval between the CF activation and its preceding SS (Fig. 5D). This phase-  
304 dependency reflects the time course of Na<sup>+</sup> channel recovery from inactivation. We  
305 confirmed this phase-dependency by reanalyzing *in vitro* experimental recordings.

306 So far, voltage states of the PC model were manipulated by varying somatic holding  
307 currents. We implemented more realistic *in vivo* simulations (Jelitai et al., 2016), in  
308 which the net balance of excitatory PF and inhibitory synaptic inputs determines the  
309 dendritic voltage states (Fig. S7). We find that the effect of voltage states on CF  
310 responses found *in vitro* also holds *in vivo*. We also analyze pauses following CSs (data  
311 *in vitro* not shown) and find their durations decrease with depolarization in our model  
312 (Fig. S7I), due to the larger depolarization force.

### 313 **Spatially constrained modulation by clustered PF/stellate cell synaptic input**

314 Sensory stimuli can activate clustered PF synaptic inputs (Wilms and Hausser, 2015).  
315 Here we examine how simultaneous clustered PF or stellate cell synaptic inputs regulate  
316 CF responses. We find that clustered synaptic inputs regulate dendritic responses in a  
317 spatially constrained manner. A secondary dendritic spikelet only occurs at branch 1  
318 with CF input in isolation (Fig. 6A). With 5 PF synapses simultaneously activated at  
319 the indicated branchlet of branch 2, the secondary dendritic spikelet also occurs at this  
320 branchlet. Concurrently, an extra spikelet is evoked in the somatic CS. Nonetheless,  
321 clustered PF synaptic inputs within branch 2 don't significantly affect other branches.  
322 Seemingly paradoxically, the extra somatic spikelet is eliminated if the number of  
323 simultaneously activated PF synapses increases to 20. As explained previously, Na<sup>+</sup>  
324 channels need time to recover from inactivation after each

325

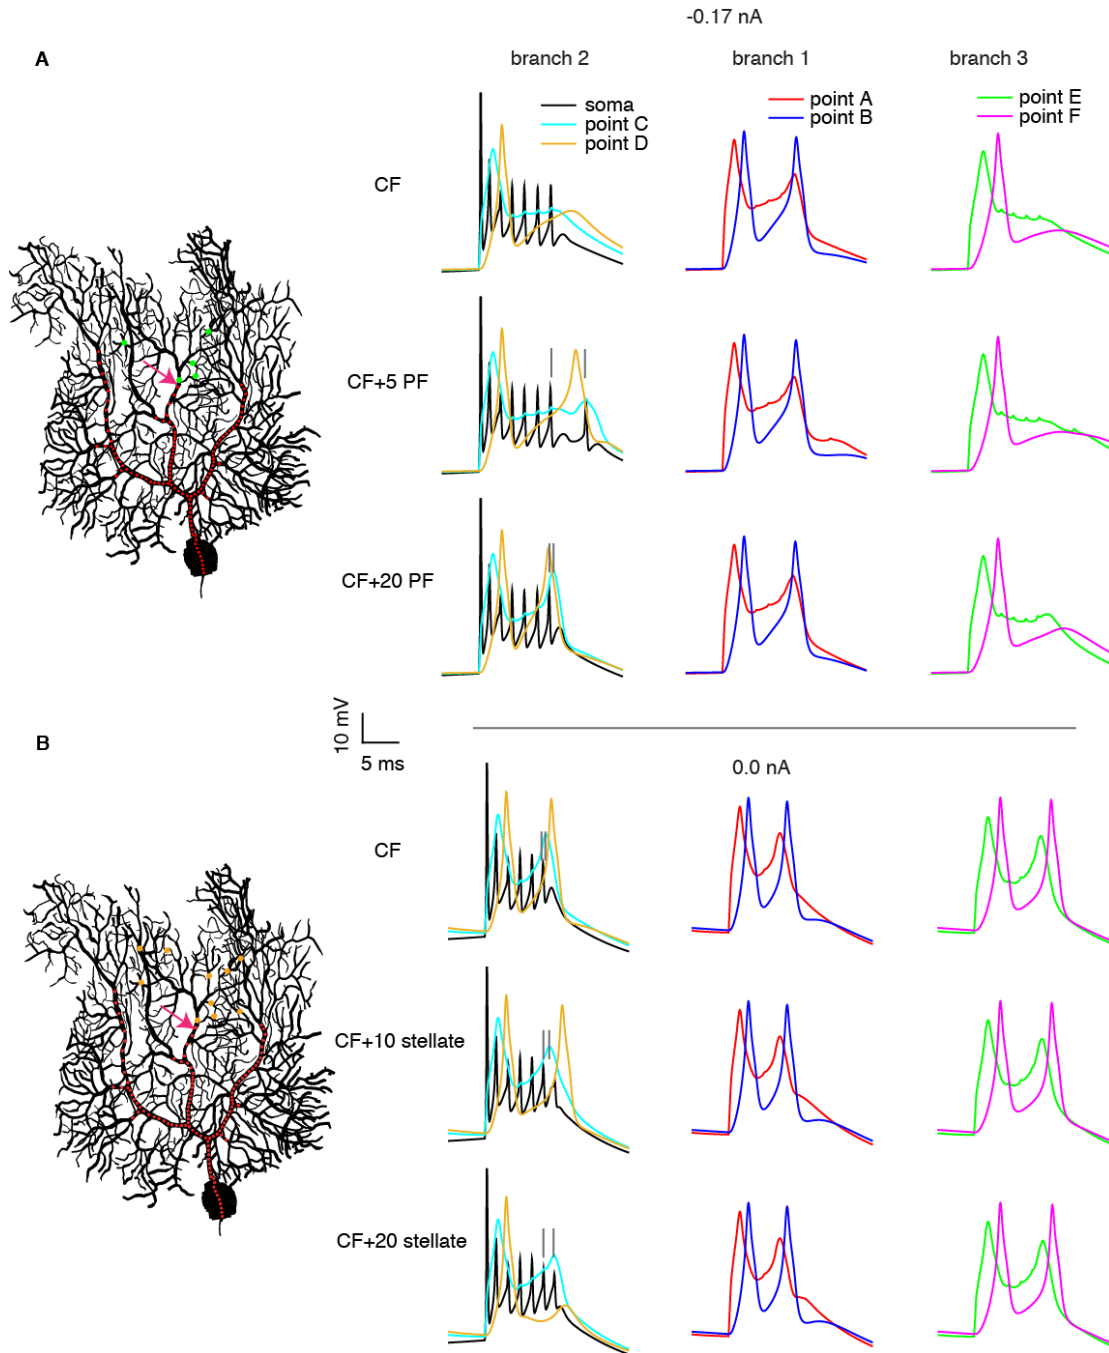

**Figure 6. Simultaneous clustered PF or stellate cell synaptic input regulates the CF-evoked somatic CSs by locally modulating the dendritic responses.**

**A.** Somatic and dendritic responses with only CF input (red dots), CF input + 5 PF synaptic inputs and CF input + 20 PF synaptic inputs are shown from top to bottom. PF synapses are randomly distributed on the child branchlet of the indicated dendritic section (green dots). **B.** Somatic and dendritic responses with only CF input, CF input + 10 stellate cell synaptic inputs and CF input + 20 stellate cell synaptic inputs are shown from top to bottom. Similar placement of stellate cell synapses (orange dots). The definition of recorded dendritic sites is the same as in Fig. 2.

326  
327  
328  
329  
330  
331  
332  
333  
334  
335  
336  
337  
338  
339  
340  
341

somatic spikelet. Increasing PF synaptic inputs accelerates secondary dendritic spikelets, making them occur closer to the preceding somatic spikelet, and reducing the likelihood of triggering an extra spikelet due to fewer recovered Na<sup>+</sup> channels. Similarly, simultaneous activation of 10 stellate cell synaptic inputs can evoke an extra somatic spikelet by delaying the secondary dendritic spikelets at branch 2 (Fig. 6B).

342 Again, dendritic responses at other branches are minimally affected. The secondary  
 343 dendritic spikelet still occurs in the proximal smooth dendrite even when it is eliminated  
 344 in the distal part by activating 20 stellate cell synaptic inputs.

345 We also show that compartment-specific dendritic excitability (Ohtsuki et al., 2012),  
 346 simulated here by regional Kv4 block, modulates dendritic responses in a spatially  
 347 precise way (Fig. S8).

### 348 Paired-pulse depression regulates CF responses in the PC

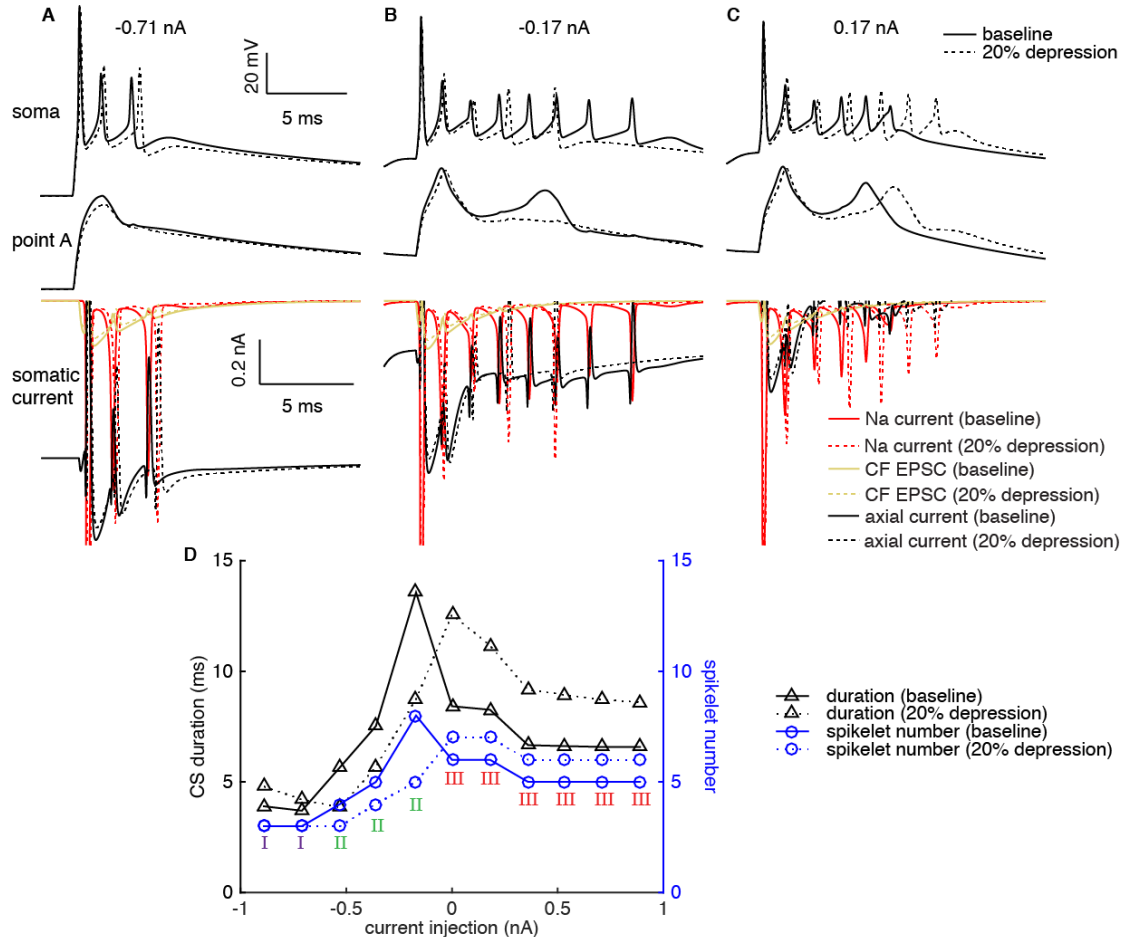

349 **Figure 7. PPD regulates CF responses.**

350 CF responses (somatic and dendritic) and somatic ionic currents with unchanged (case I), decreased (case II)  
 351 and increased (case III) spikelet numbers per CS by depressed CF EPSC are shown in **A**, **B** and **C** in  
 352 sequence. Ionic currents are computed in the central segment of the soma and Na<sup>+</sup> currents during the  
 353 first spikelet are truncated. **D**. The effect of depressed CF EPSC on the spikelet number and duration of  
 354 the CSs.  
 355

356  
 357 CFs can transiently fire at ~ 5 - 8 Hz after sensory stimuli (Najafi et al., 2014; Warnaar  
 358 et al., 2015). Paired-pulse depression (PPD) has been demonstrated for consecutive CF  
 359 synaptic inputs *in vitro* (Andjus et al., 2005; Hansel and Linden, 2000) and it may  
 360 support the correlation between instantaneous CF FRs and varied CS spikelet numbers.  
 361 To investigate the effect of PPD on CF responses, we systematically explore CF  
 362 responses with baseline or 20% depressed CF EPSC (~ 4 Hz of instantaneous CF FR  
 363 in experiments by Andjus et al. (2005)). We find depressed CF inputs consistently  
 364 reduce dendritic responses. At low voltage, the peak of the dendritic response decreases  
 365 (Fig. 7A); at higher voltage, the appearance of a secondary dendritic spikelet is  
 366 prevented (Fig. 7B) or delayed (Fig. 7C). The spikelet numbers in somatic CSs show  
 367 no changes, decreases or increases with depressed CF inputs at different voltages (Fig.

368 7A-C). A depressed CF input always delays individual somatic spikelets by providing  
369 less depolarization current. At low voltage, 20% depression of the CF EPSC and  
370 slightly reduced dendritic response are insufficient to vary somatic spikelet number and  
371 only increase CS duration (Fig. 7A and Case I in Fig. 7D). At medium voltage, baseline  
372 CF input evokes a secondary dendritic spikelet. The increased axial current (the later  
373 stage of ionic currents in Fig. 7B) triggers extra somatic spikelets due to the relatively  
374 large availability of Na<sup>+</sup> channels (see Na<sup>+</sup> current amplitude). Therefore, by not  
375 causing a secondary dendritic spikelet, depressed CF input decreases CS duration  
376 because of fewer somatic spikelets, although they are delayed (Fig. 7B and Case II in  
377 Fig. 7D). At high voltage, depressed CF input delays individual spikelets and allows  
378 for larger recovery of Na<sup>+</sup> channels. The delayed secondary dendritic spikelet also  
379 facilitates occurrence of extra somatic spikelets. Thus, depressed CF input increases CS  
380 duration (Fig. 7C and case III in Fig. 7D).

381 Voltage ranges for the occurrence of cases I-III depend on the degree of depression.  
382 For example, when CF EPSC is depressed by 10%, case I can occur at both low and  
383 high voltages (data not shown). Also, when CF FRs are higher, incomplete recovery of  
384 ionic currents from preceding CS such as SK2 and the dendritic hyperpolarization may  
385 vary the posterior CS in a more complicated way.

386 PPD can bridge the gap between instantaneous CF FRs and CS variations. Our  
387 results reconcile the observed unchanged (Warnaar et al., 2015), decreased (Khaliq and  
388 Raman, 2005; Maruta et al., 2007), and increased (Burroughs et al., 2017) somatic  
389 spikelet numbers at higher CF FRs.

## 390 **Discussion**

391 We built a new PC model based on extensive experimental data to systematically  
392 investigate CF responses. Simulation results help to reveal the mechanisms causing  
393 spikes on different parts of PCs, reconcile conflicting experimental data and make new  
394 predictions.

### 395 **Model accuracy**

396 We constrained model parameters by hand tuning and tried to replicate as many  
397 experimental observations as possible. We started by constraining somatic ionic  
398 currents based on ionic current measurements taken from dissociated PCs. These data  
399 allowed us to uniquely constrain principal somatic currents. Subsequently, the ionic  
400 currents in the AIS and dendrites were constrained to obtain the spike properties  
401 summarized in Fig. 1. It was more difficult to constrain dendritic ionic currents due to  
402 insufficient data. The total Ca<sup>2+</sup> influx during one dendritic spikelet was constrained by  
403 the experimentally estimated value. In addition, the replicated CF-evoked dendritic  
404 responses under different conditions (Fig. 3,S2,S4,S6) suggest that the dendrite model  
405 produces realistic results. Nonetheless, there is still room for improvement in the future.  
406 Due to the lack of specific data, we did not try to reproduce the role of dendritic SK2  
407 current (Ohtsuki et al., 2012; Womack and Khodakhah, 2003) and Kv1 current  
408 (Khavandgar et al., 2005) in regulating dendritic excitability. These currents may  
409 further enhance the heterogenous excitability and regulate dendritic responses. The data  
410 we used to directly validate our simulation results are all from *in vitro*. We hope our  
411 study will inspire experiments to validate modifiable CF responses *in vivo*.

412 Our PC model follows the tradition of the biophysical modeling by De Schutter and  
413 Bower (1994a, 1994b), which has successfully predicted experimental findings  
414 (Steuber et al., 2007). Although the 1994 model is outdated by recent knowledge of  
415 ionic channels in PCs, there was no suitable replacement until now. A PC model by

416 Khaliq et al. (2003) has no dendrite and therefore can't be used to simulate synaptic  
417 responses. A recent PC model (Masoli et al., 2015) lacks extensive validation against  
418 experimental data. For example, it fails to produce the stereotypical 'sag' responses to  
419 hyperpolarization.

## 420 **Physiological predictions and implications**

421 The model allows us to predict the metabolic cost of spiking in PCs. In a cortical  
422 pyramidal neuron,  $\sim 4 \times 10^8$  ATP molecules are consumed to restore the  $\text{Na}^+$  and  $\text{K}^+$  ion  
423 gradients after each spike (Attwell and Laughlin, 2001). Carter and Bean (2009)  
424 reported that spiking is energetically less efficient in PCs compared with cortical  
425 pyramidal neurons. However, their study was performed in dissociated PCs. We find  
426 the intact PC has a smaller  $\text{Na}^+$  entry ratio compared with the dissociated PC (Fig. 1H),  
427 suggesting that dendrites increase the metabolic efficiency of somatic spikes. Given the  
428 energetic cost of spikes, it will be interesting to explore whether this dendritic role also  
429 applies to other neurons. Compared with  $\text{Na}^+$  entry ratio, the estimated energy  
430 consumption may be a better measure because of the  $\text{Ca}^{2+}$  channels distributed in soma,  
431 axon and elaborate dendritic tree. Interestingly, although cortical pyramidal neurons  
432 have a low  $\text{Na}^+$  entry ratio ( $\sim 1.1$  by Carter and Bean (2009)), their estimated energetic  
433 cost of a single spike is  $\sim 8$  times larger than a SS in PCs, due to the lack of  $\text{Na}^+$  channels  
434 in PC dendrites. Each CS consumes more ATP molecules, which consumes nearly the  
435 same amount of energy as 40 SSs during 1 sec in our model. Possibly, previously  
436 reported negative correlation (Cerminara and Rawson, 2004) between the FRs of SSs  
437 and CSs may be a protective mechanism given the limited energy supply in the  
438 cerebellum.

439 CF-evoked dendritic spikes and somatic CSs are generated by different channels  
440 intrinsically, but they communicate via axial currents through the dendritic root section  
441 (Fig. 2). Due to technical challenges, dendritic patch-clamp recording is usually  
442 performed on smooth dendrites of large diameter. Though we could reproduce the  
443 experiment by Davie et al. (2008) in the model (Fig. S9), we show that a single-site  
444 dendritic recording can't reliably reflect spike occurrence and propagation in the whole  
445 dendrite. Both the peak and occurrence latency of secondary dendritic spikelets can be  
446 modulated. The peak of secondary dendritic spikelets decreases in the somatopetal  
447 direction due to unevenly distributed impedances (Roth and Hausser, 2001; Vetter et  
448 al., 2001) and  $\text{K}^+$  channels (Martina et al., 2003). When a secondary dendritic spikelet  
449 is 'weak', with small amplitude and long latency, it may fail to trigger a regenerative  
450 dendritic spike in proximal dendrites (branch 1 in Fig. S9). Therefore the role of  
451 dendritic spikes in evoking extra somatic spikelets may have been underestimated.

452 Using the model, we deciphered how voltage-dependent  $\text{K}^+$  currents regulate the  
453 amplitude (Kitamura and Hausser, 2011; Rokni et al., 2009) and spatial range of  $\text{Ca}^{2+}$   
454 influx (Fig. 3, S2-S4, S7) as observed in separate experiments (Ohtsuki et al., 2012; Otsu  
455 et al., 2014; Zaghera et al., 2010). Vetter et al. (2001) have explored the local propagation  
456 of dendritic spikes by exerting an AP clamp at a specific dendritic site. We find that  
457 dendritic spikes on the smooth dendrite can overcome the impedance mismatch and  
458 propagate to distal dendrites in the absence of the 'brake' role of  $\text{Kv4}$  in distal dendrites  
459 (Fig. S3, S5). Therefore,  $\text{K}^+$  currents activated around the 'resting' dendritic membrane  
460 potential such as  $\text{Kv4}$  in spiny dendrites are necessary to gate the spatial range of CF-  
461 evoked dendritic responses. Unlike  $\text{Kv4}$  current,  $\text{Kv3}$  current narrows the dendritic  
462 response to regulate its propagation (Fig. S4, S5). The voltage-related amplitude and  
463 spatial range of dendritic responses indicate that PCs can play active roles in response  
464 to CF error signals rather than passively accepting instruction from their CF 'teachers'.

465 PF synapses can undergo not only LTD (with a higher  $\text{Ca}^{2+}$ -induction threshold), but  
466 also long-term potentiation (LTP, with a lower  $\text{Ca}^{2+}$ -induction threshold) (Coesmans et  
467 al., 2004; Gallimore et al., 2018; Piochon et al., 2016). The voltage-regulated dendritic  
468 spike amplitude and spatial range suggest that CF may trigger LTP, a mixture of  
469 regional LTP and LTD, or LTD depending on the voltage states of PCs. Such effects  
470 will be further modified by stochastic gating of  $\text{Ca}^{2+}$  and  $\text{K}^+$  channels (Anwar et al.,  
471 2013), which was not simulated in this study.

472 The PC dendritic tree exhibits inhomogeneous excitability in individual branches,  
473 implying a computational unit at the level of individual branches, or even smaller  
474 branchlets (Fig. 4). Building upon the modulated voltage states of PCs, branch-specific  
475 computation can undoubtedly increase the capacity of information processing in PC  
476 dendrites, in contrast to the traditional view of the whole dendrite as the computational  
477 unit of CF response. Notably, branchlet-specific  $\text{Ca}^{2+}$  influx has been demonstrated for  
478 PF synaptic integration (Wang et al., 2000). When PCs receive concurrent clustered  
479 synaptic input (Wilms and Hausser, 2015) or undergo localized dendritic excitability  
480 plasticity (Ohtsuki et al., 2012), CF-evoked dendritic responses can be modulated more  
481 precisely in space and magnitude to affect the plasticity induction (Fig. 6,S8).

482 CS shapes are quite variable. In our model, we did not get the ‘small’ second  
483 spikelets as observed in some experiments (Davie et al., 2008; Monsivais et al., 2005),  
484 but our CS shapes are close to other recordings (Jelitai et al., 2016; Mathy et al., 2009;  
485 Otsu et al., 2014). We speculate that CS shapes are cell-dependent. Recently, CS  
486 durations have been linked to the degree of trial-over-trial learning (Yang and Lisberger,  
487 2014), with the mechanism underlying variable CSs unresolved. The authors assumed  
488 that the variation of CS durations is due to the bursting of CF inputs, based on Mathy  
489 et al. (2009). We correlate the spikelet numbers and durations of CSs with voltage states  
490 or SSFRs (Fig. 5A-B). Besides reconciling previous contradictory correlations between  
491 spikelet numbers and SSFRs (Burroughs et al., 2017; Gilbert, 1976; Khaliq and Raman,  
492 2005; Mano, 1970; Warnaar et al., 2015), our results provide an alternative  
493 interpretation of the work by Yang and Lisberger (2014). Our interpretation highlights  
494 the importance of all synaptic inputs to the PCs and resulting SSFRs, not just CF, to  
495 control learning. Additionally, the CS spikelet amplitudes can be modulated by voltage  
496 states (Fig. 5C, S7H). The timing of CF activation (phase-dependency) and concurrent  
497 synaptic input also affect somatic CSs (Fig. 5D, 6). All these factors vary CS shapes  
498 and may modulate the PC output and affect inhibition of the CN. Although CF-evoked  
499 pause decreases at higher firing rates (Fig. S7I), they are very variable (Mathy et al.,  
500 2009) when voltage states, CF activation phase or CF input conductance are varied.  
501 Sometimes, there is even no ‘obvious’ pause following a CS.

502 The CF input itself is not ‘all-or-none’ either. The variable number of spikes per CF  
503 burst can affect both somatic and dendritic responses (Mathy et al., 2009) (Fig. S1).  
504 Furthermore, CF synaptic inputs can be regulated by PPD (Andjus et al., 2005; Hansel  
505 and Linden, 2000) and by norepinephrine (Carey and Regehr, 2009). Both of them can  
506 depress the CF EPSC to modulate somatic and dendritic responses (Fig. 7). In particular,  
507 PPD bridges the gap between instantaneous CF FRs and varied CS spikelet numbers  
508 (Burroughs et al., 2017; Khaliq and Raman, 2005; Maruta et al., 2007; Warnaar et al.,  
509 2015) and can play an important role in regulating CF responses.

## 510 **Methods**

511 All simulations were performed with NEURON, version 7.4 (Hines and Carnevale,  
512 1997). We use the morphology of a 21-day-old Wistar rat PC (Roth and Hausser, 2001).  
513 As shown in Fig. 2A, the model consists of an AIS (purple), a soma (red), smooth

514 dendrites (black), and spiny dendrites (gray). The first 17  $\mu\text{m}$  of the reconstructed axon  
515 are preserved as the AIS. When exploring the spike initiation site, AIS indicates the end  
516 next to the myelinated axon. The model has following passive parameters:  $R_m = 120.2$   
517  $\text{k}\Omega \text{ cm}^2$ ,  $R_i = 120 \Omega \text{ cm}$ ,  $C_m = 0.64 \mu\text{F}/\text{cm}^2$ . To compensate for the absence of spines in  
518 the reconstructed morphology, the conductance of passive current and  $C_m$  are scaled by  
519 a factor of 5.3 in the spiny dendrite and 1.2 in the smooth dendrite. The conductance  
520 densities of ionic currents in different parts of the model were found by hand tuning.  
521 Detailed information about ionic current equations and the process of parameter tuning  
522 can be found in Supplementary Information.

523 The spiking threshold of SSs was defined as the membrane potential at which  $dv/dt =$   
524  $20 \text{ mV}/\text{ms}$ . The synaptic conductance activated by CF input is approximated as a bi-  
525 exponential waveform, with 0.3 ms and 3 ms as the rise and decay time constants (Davie  
526 et al., 2008). The peak conductance of baseline CF input is 1.2 nS. 500 synaptic inputs  
527 are distributed on the soma and smooth dendrite at a constant density per length to  
528 simulate the CF input. The conductance varies in the range of 80% - 100% to simulate  
529 the EPSC changes by PPD. Due to the elaborate structure, the dendrite is not  
530 isopotential with the soma when holding current is injected at the soma. The somatic  
531 membrane potential is used to represent the voltage state of the PC except in Fig. 4, in  
532 which dendritic membrane potential is used. When measuring the distance-dependence  
533 of the peak dendritic response, we selected the first dendritic spikelet if there were two  
534 spikelets. To measure the excitability of individual branches, we define a new measure  
535 as the ratio of the spiny dendrite capacitance load to CF synaptic input, ‘load/input’  
536 ratio, which can be transformed into ‘area of spiny dendrite’/‘length of smooth dendrite’  
537 within each branch in the model. To exclude the effect of phase-dependence on CSs in  
538 Fig. 5, all the CF signals are activated with 3 ms after the preceding SS under different  
539 voltage states. To explore how simultaneous clustered synaptic inputs regulate dendritic  
540 response and somatic output, PF or stellate cell synaptic inputs are activated 5 ms after  
541 the CF input (Fig. 6). To simply mimic the PC voltage states *in vivo*, 1105 PF synapses  
542 and 1105 Inhibitory synapses are uniformly distributed on the spiny dendrites. Different  
543 voltage states of the PC are achieved by randomly activating excitatory and inhibitory  
544 synapses at different average FRs. To estimate the energy cost of spikes, we computed  
545 the  $\text{Na}^+$  (3  $\text{Na}^+$  ions consume 1 ATP molecule) and  $\text{Ca}^{2+}$  influx (1  $\text{Ca}^{2+}$  ion consumes 1  
546 ATP molecule) during a spike in the whole PC (AIS, soma and dendrite) (Attwell and  
547 Laughlin, 2001).

548 **Data availability.** The model code will be available from ModelDB.

#### 549 **Acknowledgements**

550 We thank Ede Rancz, Michael Häusser, Gen Ohtsuki, Christian Hansel, João Couto  
551 (the data shared by above-mentioned people were used in the manuscript for validation  
552 of the simulation results), Bruce Bean, Indira Raman (the data shared by above-  
553 mentioned people were used to constrain ionic current properties), Mathew Nolan,  
554 Edward Zagher, Bernardo Rudy and Paul Mathews for sharing related experimental data  
555 for us to understand PC properties.

#### 556 **Author Contributions**

557 Y.L.Z., S.D., and E.D.S. conceived this study; Y.L.Z. performed all the simulations;  
558 Y.L.Z. and E.D.S. analyzed the simulation data; Y.L.Z. and E.D.S. wrote and revised  
559 the manuscript.

560



561 **References**

- 562 Albus, J.S. (1971). A theory of cerebellar function. *Mathematical Biosciences* *10*,  
563 25-61.
- 564 Andjus, P.R., Bajic, A., Zhu, L., Schachner, M., and Strata, P. (2005). Short-term  
565 facilitation and depression in the cerebellum: some observations on wild-type and  
566 mutant rodents deficient in the extracellular matrix molecule tenascin C. *Annals*  
567 *of the New York Academy of Sciences* *1048*, 185-197.
- 568 Anwar, H., Hepburn, I., Nedelescu, H., Chen, W., and De Schutter, E. (2013).  
569 Stochastic calcium mechanisms cause dendritic calcium spike variability. *The*  
570 *Journal of neuroscience : the official journal of the Society for Neuroscience* *33*,  
571 15848-15867.
- 572 Attwell, D., and Laughlin, S.B. (2001). An energy budget for signaling in the grey  
573 matter of the brain. *Journal of cerebral blood flow and metabolism : official journal*  
574 *of the International Society of Cerebral Blood Flow and Metabolism* *21*, 1133-1145.
- 575 Bekkers, J.M., and Hausser, M. (2007). Targeted dendrotomy reveals active and  
576 passive contributions of the dendritic tree to synaptic integration and neuronal  
577 output. *Proceedings of the National Academy of Sciences of the United States of*  
578 *America* *104*, 11447-11452.
- 579 Burroughs, A., Wise, A.K., Xiao, J.Q., Houghton, C., Tang, T.Y., Suh, C.Y., Lang, E.J.,  
580 Apps, R., and Cerminara, N.L. (2017). The dynamic relationship between  
581 cerebellar Purkinje cell simple spikes and the spikelet number of complex spikes.  
582 *J Physiol-London* *595*, 283-299.
- 583 Carey, M.R., and Regehr, W.G. (2009). Noradrenergic control of associative  
584 synaptic plasticity by selective modulation of instructive signals. *Neuron* *62*, 112-  
585 122.
- 586 Carter, B.C., and Bean, B.P. (2009). Sodium entry during action potentials of  
587 mammalian neurons: incomplete inactivation and reduced metabolic efficiency in  
588 fast-spiking neurons. *Neuron* *64*, 898-909.
- 589 Carter, B.C., and Bean, B.P. (2011). Incomplete inactivation and rapid recovery of  
590 voltage-dependent sodium channels during high-frequency firing in cerebellar  
591 Purkinje neurons. *Journal of neurophysiology* *105*, 860-871.
- 592 Cerminara, N.L., and Rawson, J.A. (2004). Evidence that climbing fibers control an  
593 intrinsic spike generator in cerebellar Purkinje cells. *Journal of Neuroscience* *24*,  
594 4510-4517.
- 595 Coesmans, M., Weber, J.T., De Zeeuw, C.I., and Hansel, C. (2004). Bidirectional  
596 parallel fiber plasticity in the cerebellum under climbing fiber control. *Neuron* *44*,  
597 691-700.
- 598 Davie, J.T., Clark, B.A., and Hausser, M. (2008). The origin of the complex spike in  
599 cerebellar Purkinje cells. *The Journal of neuroscience : the official journal of the*  
600 *Society for Neuroscience* *28*, 7599-7609.
- 601 De Schutter, E., and Bower, J.M. (1994a). An active membrane model of the  
602 cerebellar Purkinje cell II. Simulation of synaptic responses. *Journal of*  
603 *neurophysiology* *71*, 401-419.
- 604 De Schutter, E., and Bower, J.M. (1994b). An active membrane model of the  
605 cerebellar Purkinje cell. I. Simulation of current clamps in slice. *Journal of*  
606 *neurophysiology* *71*, 375-400.
- 607 Deneux, T., Kaszas, A., Szalay, G., Katona, G., Lakner, T., Grinvald, A., Rozsa, B., and  
608 Vanzetta, I. (2016). Accurate spike estimation from noisy calcium signals for

609 ultrafast three-dimensional imaging of large neuronal populations in vivo. *Nature*  
610 *communications* 7, 12190.

611 Fernandez, F.R., Engbers, J.D., and Turner, R.W. (2007). Firing dynamics of  
612 cerebellar purkinje cells. *Journal of neurophysiology* 98, 278-294.

613 Gallimore, A.R., Kim, T., Tanaka-Yamamoto, K., and De Schutter, E. (2018).  
614 Switching On Depression and Potentiation in the Cerebellum. *Cell reports* 22, 722-  
615 733.

616 Gilbert, P.F. (1976). Simple spike frequency and the number of secondary spikes  
617 in the complex spike of the cerebellar Purkinje cell. *Brain research* 114, 334-338.

618 Hansel, C., and Linden, D.J. (2000). Long-term depression of the cerebellar  
619 climbing fiber--Purkinje neuron synapse. *Neuron* 26, 473-482.

620 Hines, M.L., and Carnevale, N.T. (1997). The NEURON simulation environment.  
621 *Neural computation* 9, 1179-1209.

622 Ito, M. (1972). Neural design of the cerebellar motor control system. *Brain*  
623 *research* 40, 81-84.

624 Jelitai, M., Puggioni, P., Ishikawa, T., Rinaldi, A., and Duguid, I. (2016). Dendritic  
625 excitation-inhibition balance shapes cerebellar output during motor behaviour.  
626 *Nature communications* 7, 13722.

627 Khaliq, Z.M., Gouwens, N.W., and Raman, I.M. (2003). The contribution of  
628 resurgent sodium current to high-frequency firing in Purkinje neurons: an  
629 experimental and modeling study. *The Journal of neuroscience : the official journal*  
630 *of the Society for Neuroscience* 23, 4899-4912.

631 Khaliq, Z.M., and Raman, I.M. (2005). Axonal propagation of simple and complex  
632 spikes in cerebellar Purkinje neurons. *The Journal of neuroscience : the official*  
633 *journal of the Society for Neuroscience* 25, 454-463.

634 Khavandgar, S., Walter, J.T., Sageser, K., and Khodakhah, K. (2005). Kv1 channels  
635 selectively prevent dendritic hyperexcitability in rat Purkinje cells. *The Journal of*  
636 *physiology* 569, 545-557.

637 Kitamura, K., and Hausser, M. (2011). Dendritic calcium signaling triggered by  
638 spontaneous and sensory-evoked climbing fiber input to cerebellar Purkinje cells  
639 in vivo. *The Journal of neuroscience : the official journal of the Society for*  
640 *Neuroscience* 31, 10847-10858.

641 Llinas, R., and Sugimori, M. (1980). Electrophysiological properties of in vitro  
642 Purkinje cell dendrites in mammalian cerebellar slices. *The Journal of physiology*  
643 305, 197-213.

644 Mano, N. (1970). Changes of simple and complex spike activity of cerebellar  
645 purkinje cells with sleep and waking. *Science* 170, 1325-1327.

646 Marr, D. (1969). A theory of cerebellar cortex. *The Journal of physiology* 202, 437-  
647 470.

648 Martina, M., Metz, A.E., and Bean, B.P. (2007). Voltage-dependent potassium  
649 currents during fast spikes of rat cerebellar Purkinje neurons: inhibition by BDS-I  
650 toxin. *Journal of neurophysiology* 97, 563-571.

651 Martina, M., Yao, G.L., and Bean, B.P. (2003). Properties and functional role of  
652 voltage-dependent potassium channels in dendrites of rat cerebellar Purkinje  
653 neurons. *The Journal of neuroscience : the official journal of the Society for*  
654 *Neuroscience* 23, 5698-5707.

655 Maruta, J., Hensbroek, R.A., and Simpson, J.I. (2007). Intraburst and interburst  
656 signaling by climbing fibers. *The Journal of neuroscience : the official journal of*  
657 *the Society for Neuroscience* 27, 11263-11270.

658 Masoli, S., Solinas, S., and D'Angelo, E. (2015). Action potential processing in a  
659 detailed Purkinje cell model reveals a critical role for axonal  
660 compartmentalization. *Front Cell Neurosci* 9, 47.

661 Mathy, A., Ho, S.S., Davie, J.T., Duguid, I.C., Clark, B.A., and Hausser, M. (2009).  
662 Encoding of oscillations by axonal bursts in inferior olive neurons. *Neuron* 62,  
663 388-399.

664 Monsivais, P., Clark, B.A., Roth, A., and Hausser, M. (2005). Determinants of action  
665 potential propagation in cerebellar Purkinje cell axons. *The Journal of  
666 neuroscience : the official journal of the Society for Neuroscience* 25, 464-472.

667 Najafi, F., Giovannucci, A., Wang, S.S., and Medina, J.F. (2014). Coding of stimulus  
668 strength via analog calcium signals in Purkinje cell dendrites of awake mice. *eLife*  
669 3, e03663.

670 Ohtsuki, G., Piochon, C., Adelman, J.P., and Hansel, C. (2012). SK2 channel  
671 modulation contributes to compartment-specific dendritic plasticity in cerebellar  
672 Purkinje cells. *Neuron* 75, 108-120.

673 Otsu, Y., Marcaggi, P., Feltz, A., Isope, P., Kollo, M., Nusser, Z., Mathieu, B., Kano, M.,  
674 Tsujita, M., Sakimura, K., *et al.* (2014). Activity-dependent gating of calcium spikes  
675 by A-type K<sup>+</sup> channels controls climbing fiber signaling in Purkinje cell dendrites.  
676 *Neuron* 84, 137-151.

677 Palmer, L.M., Clark, B.A., Grundemann, J., Roth, A., Stuart, G.J., and Hausser, M.  
678 (2010). Initiation of simple and complex spikes in cerebellar Purkinje cells. *The  
679 Journal of physiology* 588, 1709-1717.

680 Piochon, C., Titley, H.K., Simmons, D.H., Grasselli, G., Elgersma, Y., and Hansel, C.  
681 (2016). Calcium threshold shift enables frequency-independent control of  
682 plasticity by an instructive signal. *Proceedings of the National Academy of  
683 Sciences of the United States of America* 113, 13221-13226.

684 Rancz, E.A., and Hausser, M. (2010). Dendritic spikes mediate negative synaptic  
685 gain control in cerebellar Purkinje cells. *Proceedings of the National Academy of  
686 Sciences of the United States of America* 107, 22284-22289.

687 Rokni, D., Tal, Z., Byk, H., and Yarom, Y. (2009). Regularity, variability and bi-  
688 stability in the activity of cerebellar purkinje cells. *Front Cell Neurosci* 3, 12.

689 Roth, A., and Hausser, M. (2001). Compartmental models of rat cerebellar Purkinje  
690 cells based on simultaneous somatic and dendritic patch-clamp recordings. *The  
691 Journal of physiology* 535, 445-472.

692 Schmolesky, M.T., Weber, J.T., De Zeeuw, C.I., and Hansel, C. (2002). The making of  
693 a complex spike: ionic composition and plasticity. *Annals of the New York  
694 Academy of Sciences* 978, 359-390.

695 Steuber, V., Mittmann, W., Hoebeek, F.E., Silver, R.A., De Zeeuw, C.I., Hausser, M.,  
696 and De Schutter, E. (2007). Cerebellar LTD and pattern recognition by Purkinje  
697 cells. *Neuron* 54, 121-136.

698 Stuart, G., and Hausser, M. (1994). Initiation and spread of sodium action  
699 potentials in cerebellar Purkinje cells. *Neuron* 13, 703-712.

700 Swensen, A.M., and Bean, B.P. (2003). Ionic mechanisms of burst firing in  
701 dissociated Purkinje neurons. *The Journal of neuroscience : the official journal of  
702 the Society for Neuroscience* 23, 9650-9663.

703 Vetter, P., Roth, A., and Hausser, M. (2001). Propagation of action potentials in  
704 dendrites depends on dendritic morphology. *Journal of neurophysiology* 85, 926-  
705 937.

706 Wang, S.S., Denk, W., and Hausser, M. (2000). Coincidence detection in single  
707 dendritic spines mediated by calcium release. *Nature neuroscience* 3, 1266-1273.  
708 Warnaar, P., Couto, J., Negrello, M., Junker, M., Smilgin, A., Ignashchenkova, A.,  
709 Giugliano, M., Thier, P., and De Schutter, E. (2015). Duration of Purkinje cell  
710 complex spikes increases with their firing frequency. *Front Cell Neurosci* 9.  
711 Wilms, C.D., and Hausser, M. (2015). Reading out a spatiotemporal population  
712 code by imaging neighbouring parallel fibre axons in vivo. *Nature communications*  
713 6, 6464.  
714 Womack, M.D., and Khodakhah, K. (2003). Somatic and dendritic small-  
715 conductance calcium-activated potassium channels regulate the output of  
716 cerebellar Purkinje neurons. *The Journal of neuroscience : the official journal of*  
717 *the Society for Neuroscience* 23, 2600-2607.  
718 Yang, Y., and Lisberger, S.G. (2014). Purkinje-cell plasticity and cerebellar motor  
719 learning are graded by complex-spike duration. *Nature* 510, 529-532.  
720 Zagha, E., Manita, S., Ross, W.N., and Rudy, B. (2010). Dendritic Kv3.3 potassium  
721 channels in cerebellar purkinje cells regulate generation and spatial dynamics of  
722 dendritic Ca<sup>2+</sup> spikes. *Journal of neurophysiology* 103, 3516-3525.  
723

724 **Supplementary Information**

725

726 **Supplementary Figures**

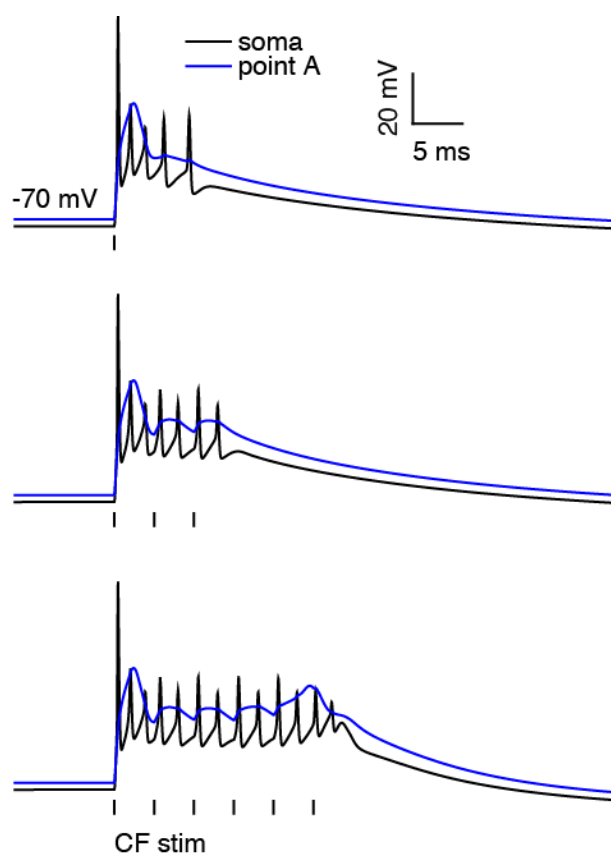

727

728 **Figure S1. PC responses to CF bursts. Related to Figure 1.**

729 We reproduced the experiment by Mathy et al. (2009). Example somatic and dendritic responses to CF  
730 burst with 1 (top), 3 (middle) and 6 spikes (bottom) in the CF burst. The simulated instantaneous CF  
731 bursting frequency is 250 Hz close to the experimentally reported ~ 273 Hz.

732

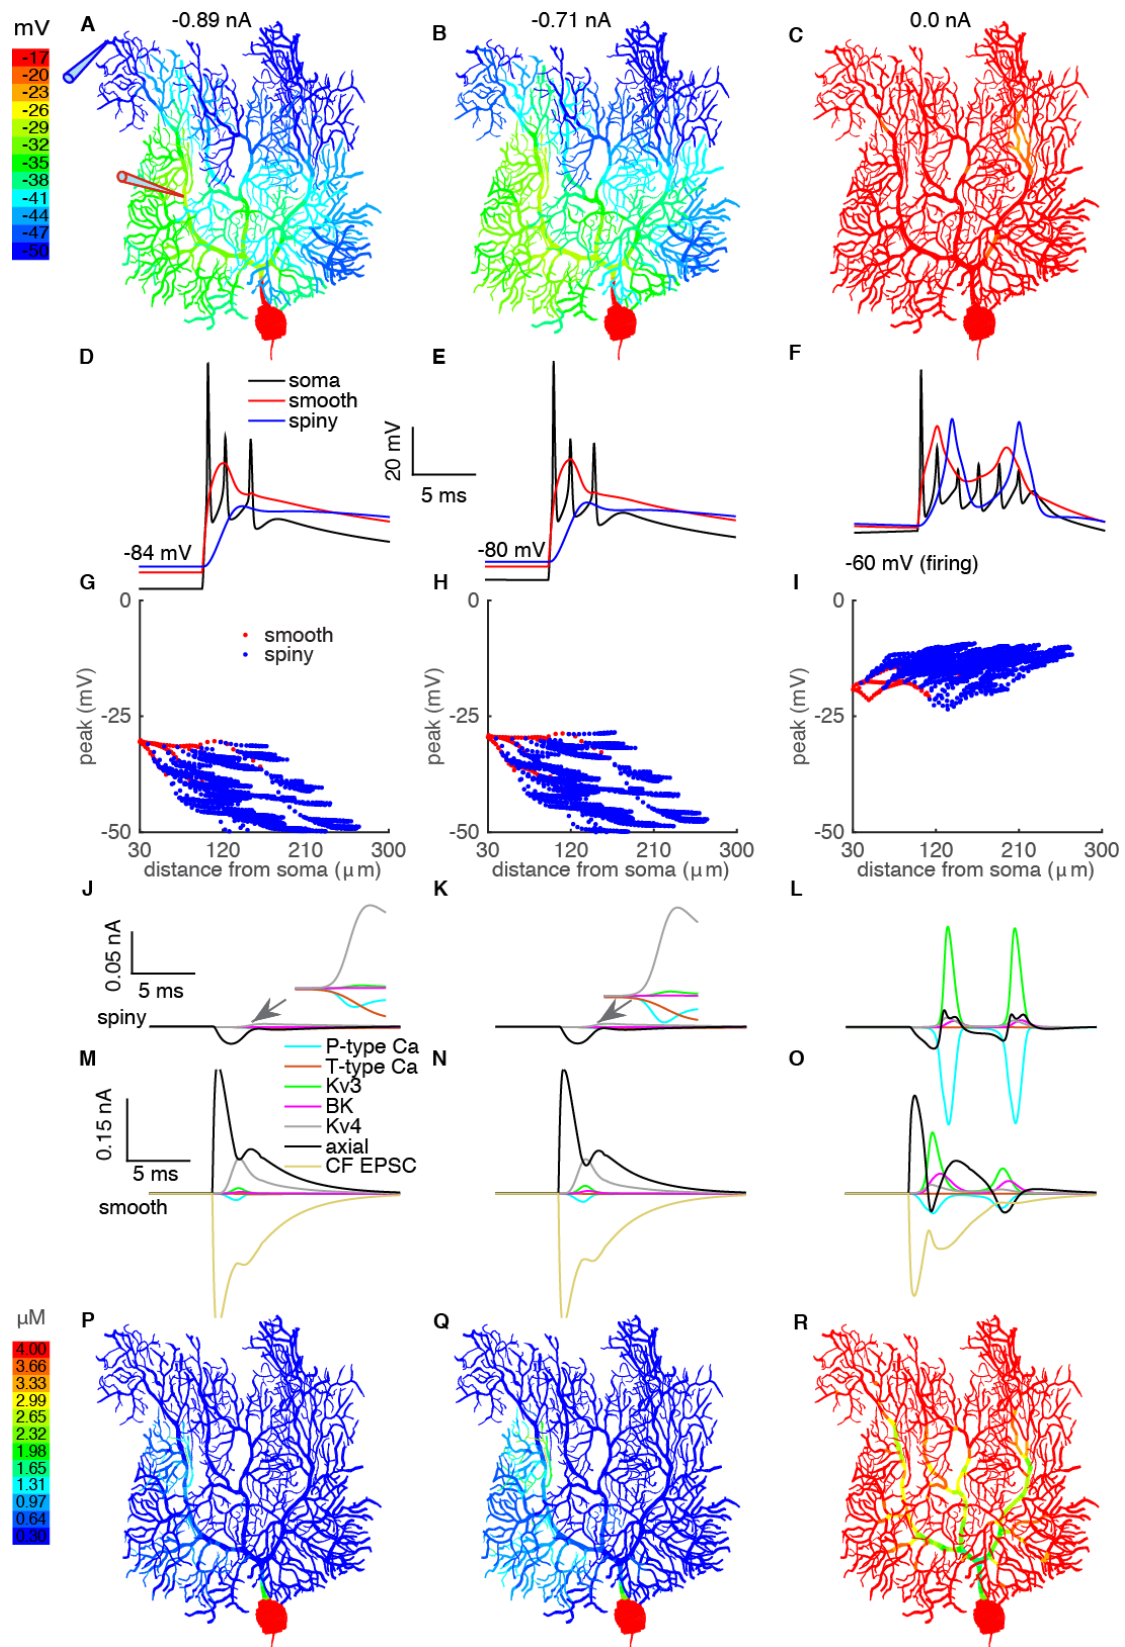

733  
734  
735  
736  
737  
738  
739

**Figure S2. Voltage states regulate CF-evoked dendritic spike generation and propagation. Related to Figure 3.**

From left to right column, the holding potentials are -84 mV, -80 mV and -60 mV respectively. **A-C.** Color-coded voltage responses. **D-F.** Somatic CSs, voltage responses on the smooth dendrite and spiny dendrite. **G-I.** Distance-dependent propagation of voltage responses. **J-L** and **M-O** show ionic currents in the spiny dendrite and smooth dendrite respectively. The surface areas of the segments chosen at the

740 smooth dendrite and spiny dendrite are  $64 \mu\text{m}^2$  and  $23 \mu\text{m}^2$  respectively. **P-R.** Color-coded  $\text{Ca}^{2+}$   
741 concentrations.

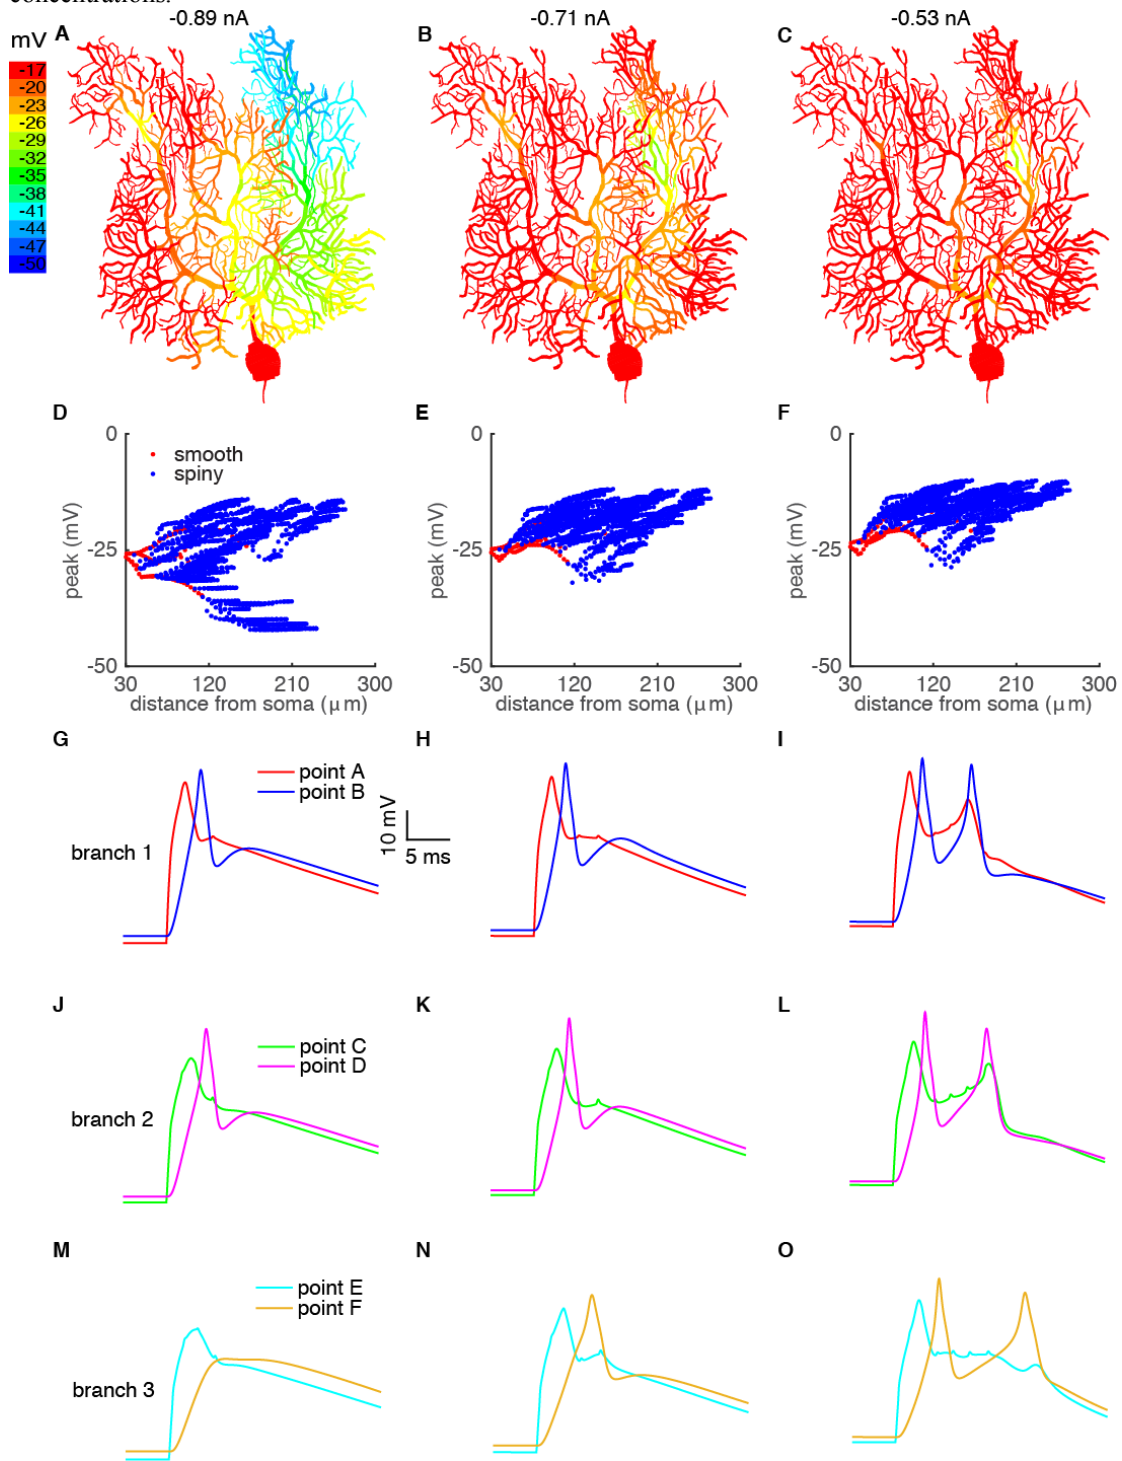

742  
743

744 **Figure S3. locking Kv4 current facilitates dendritic spike generation and propagation and makes**  
745 **dendritic excitability more homogeneous. Related to Figure 3 and Figure 4.**

746 Dendritic responses to holding currents of -0.89 nA, -0.71 nA and -0.53 nA are shown from left to right.  
747 Color-coded voltage response, distance-dependent propagation of voltage response, and voltage  
748 responses (EPSP or spike) at different branches are shown from top to bottom. The definition of recorded  
749 dendritic sites is the same as in Fig. 2.

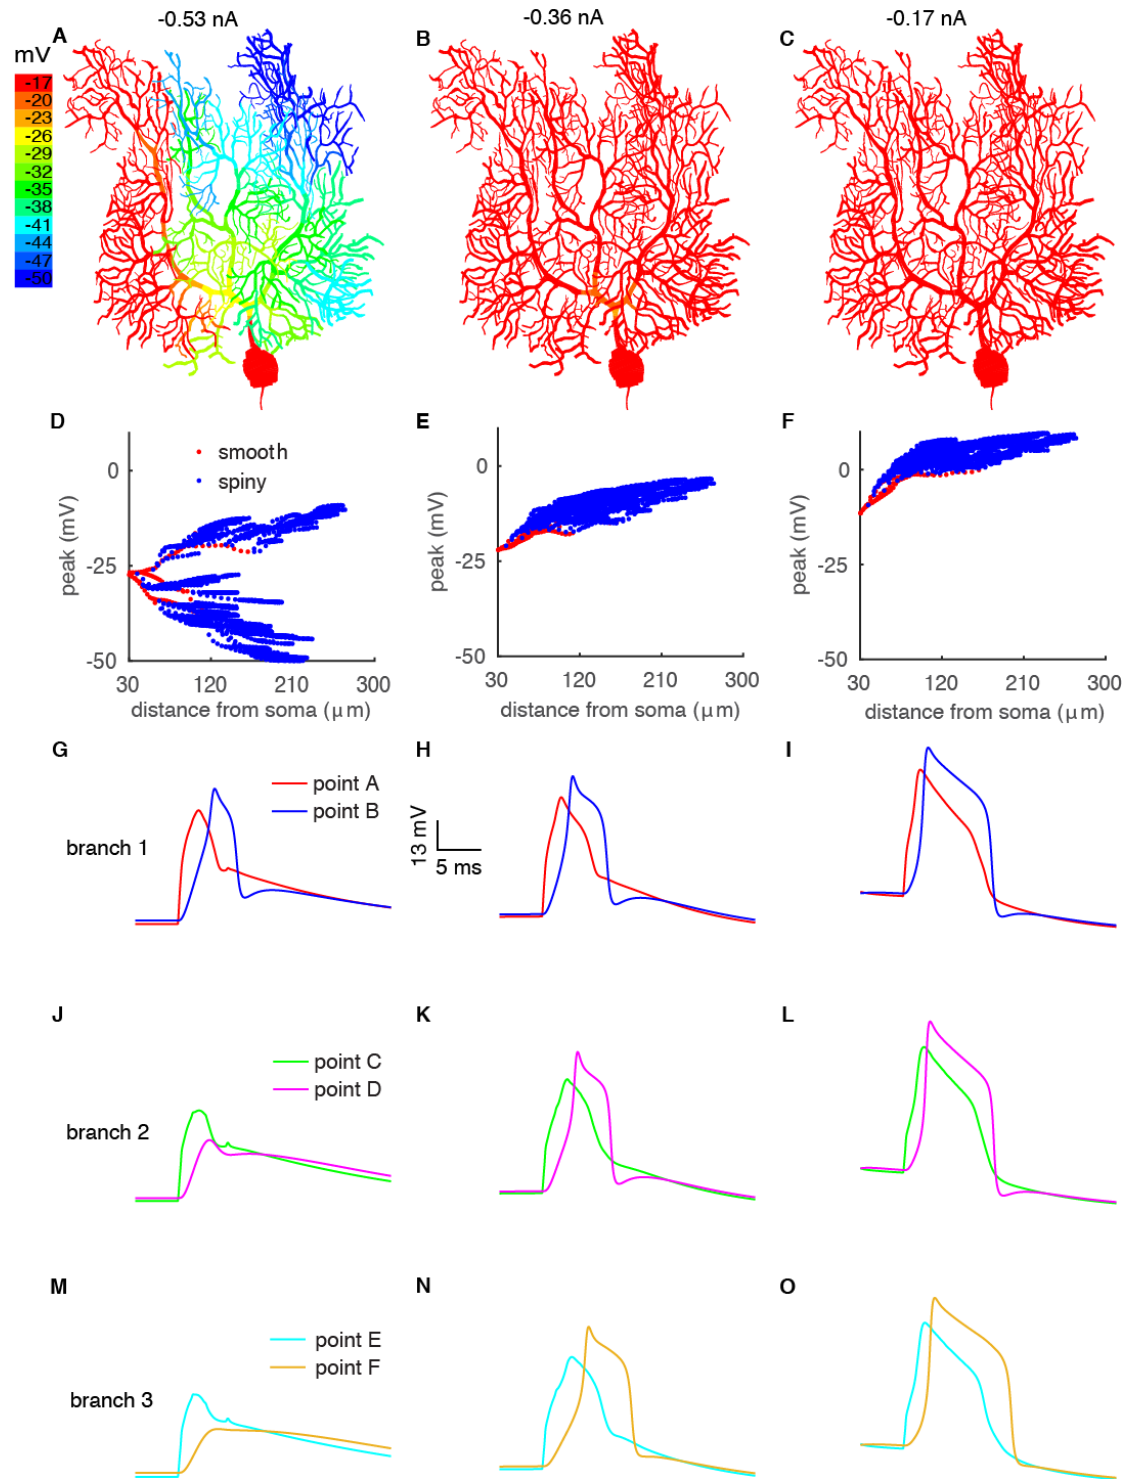

750  
751  
752  
753  
754  
755  
756  
757

**Fig S4. Blocking Kv3 current facilitates the propagation of dendritic spikes by increasing their durations. Related to Figure 3.**

Dendritic responses with holding currents of -0.53 nA, -0.36 nA and -0.17 nA are shown from left to right. Color-coded voltage response, distance-dependent propagation of voltage response, and voltage responses (EPSP or spike) at different branches are shown from top to bottom. Notice the broader dendritic spikes (G-O) with an overshoot amplitude (dendritic peak is above 0 mV in F). The definition of recorded dendritic sites is the same as in Fig. 2.



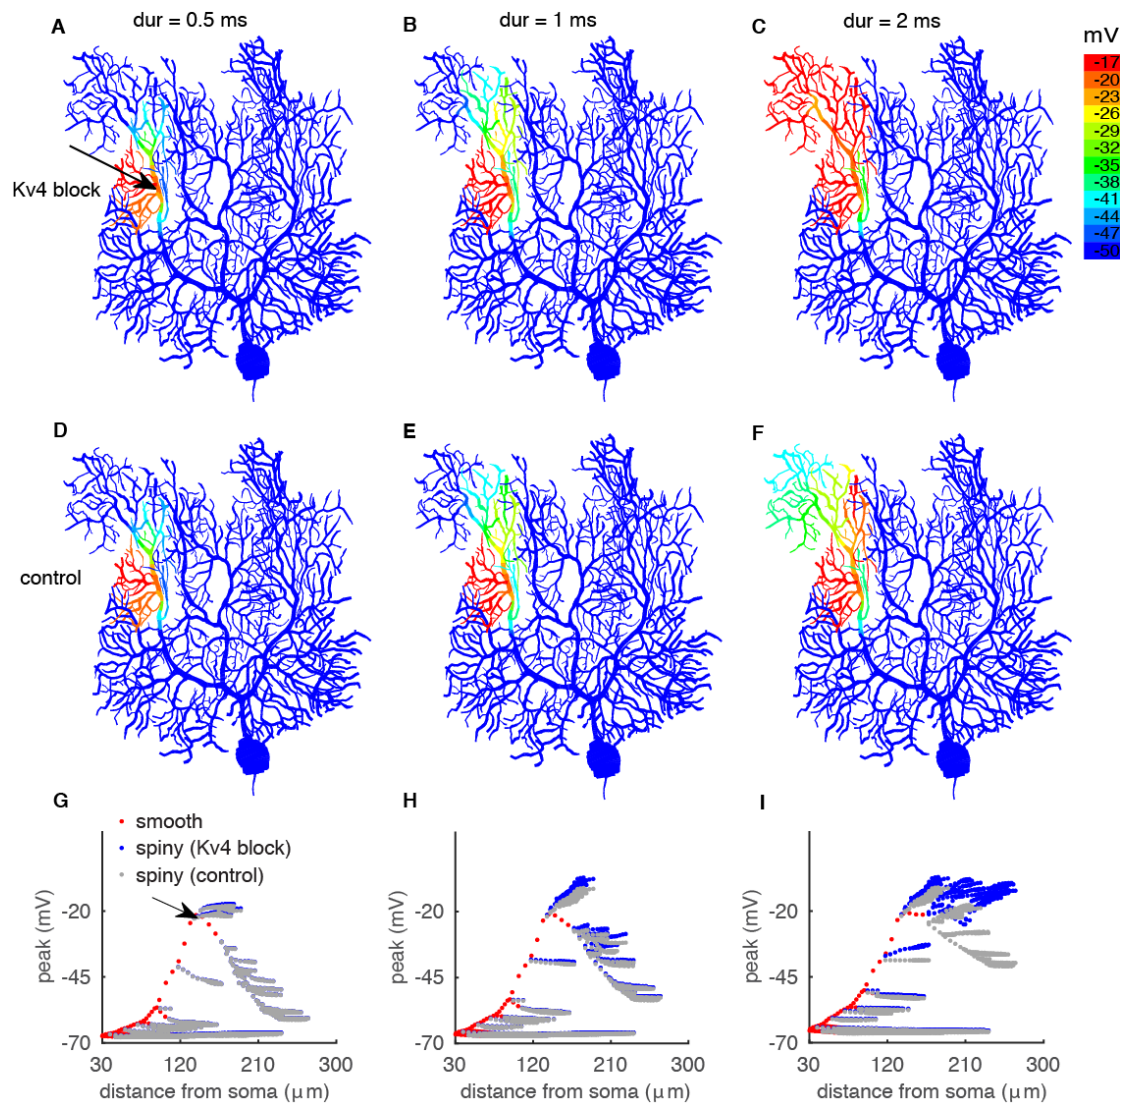

758  
759  
760  
761  
762  
763  
764  
765  
766  
767  
768

**Fig S5. Broadening of dendritic spikes facilitates their propagation. Related to Figure 3.**

We exerted square wave voltage clamps (peak is -20 mV, similar with dendritic spikes) with varying durations at the indicated sites of the smooth dendrite to explore propagation efficiency. The duration increases from 0.5 ms to 2 ms from A to C (Kv4 block) and D to F (control). The distance-dependent propagation of this signal is shown in G-I to reflect the relative contribution of impedance mismatch and Kv4 current on the decay of this signal. The clamped site is indicated in G. The PC is voltage clamped to -70 mV at the soma. Notice that Kv4 block did not affect the forward propagation to the soma of this signal.

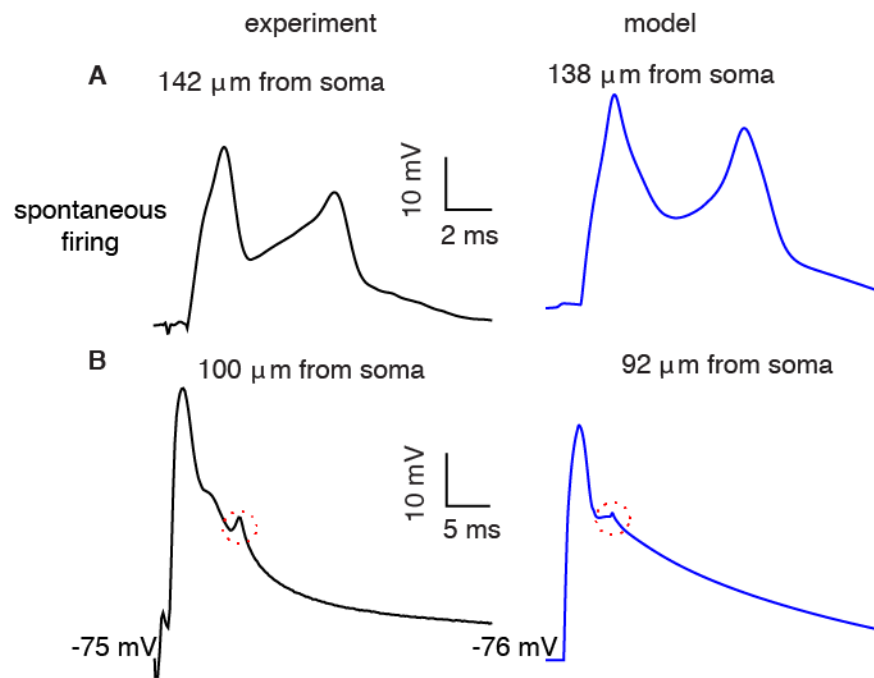

769  
770  
771  
772  
773  
774  
775  
776  
777

**Figure S6. CF-evoked dendritic voltage response waveforms with different current injections (holding potentials). Related to Figure 3.**

**A.** CF-evoked dendritic spikes with two spikelets in the experiment (left, reproduced from Fig. 5A of Davie et al. (2008)) and in the model (right). **B.** CF-evoked dendritic voltage responses in the experiment (left, data from Ohtsuki et al. (2012)) and in the model (right). The 'deflection' caused by a somatic  $\text{Na}^+$  spikelet can be found on top of the dendritic response under this condition in both experimental recordings and in the model (circled in the figure).

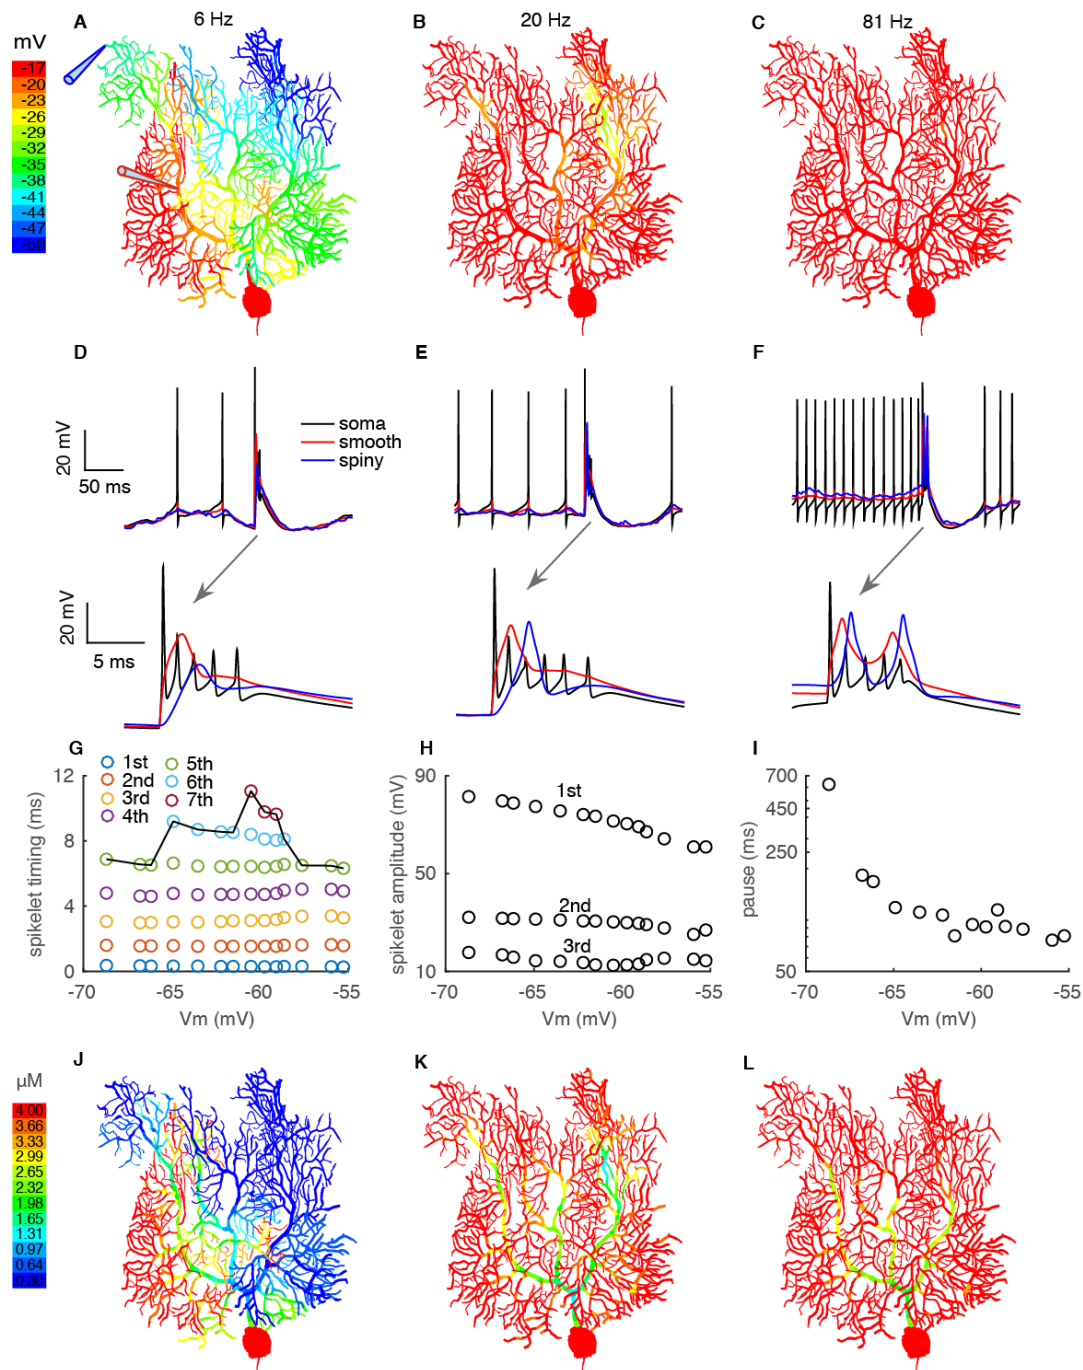

778  
779  
780  
781  
782  
783  
784  
785  
786

**Figure S7. CF responses when the voltage states of the PC are manipulated by combined excitatory and inhibitory synaptic inputs. Related to Figure 5.**

A-C show color-coded voltage responses with increasing SSFRs. D-F show the corresponding somatic and dendritic responses. CF responses at a higher time scale are shown in their bottom panels. G shows the effect of somatic voltage states on the CS spikelet numbers and durations. H. Effect of somatic voltage states on the amplitudes of the first 3 somatic spikelets. I. CF-evoked pause decreases with depolarization. J-L show color-coded Ca<sup>2+</sup> concentrations with increasing SSFRs.

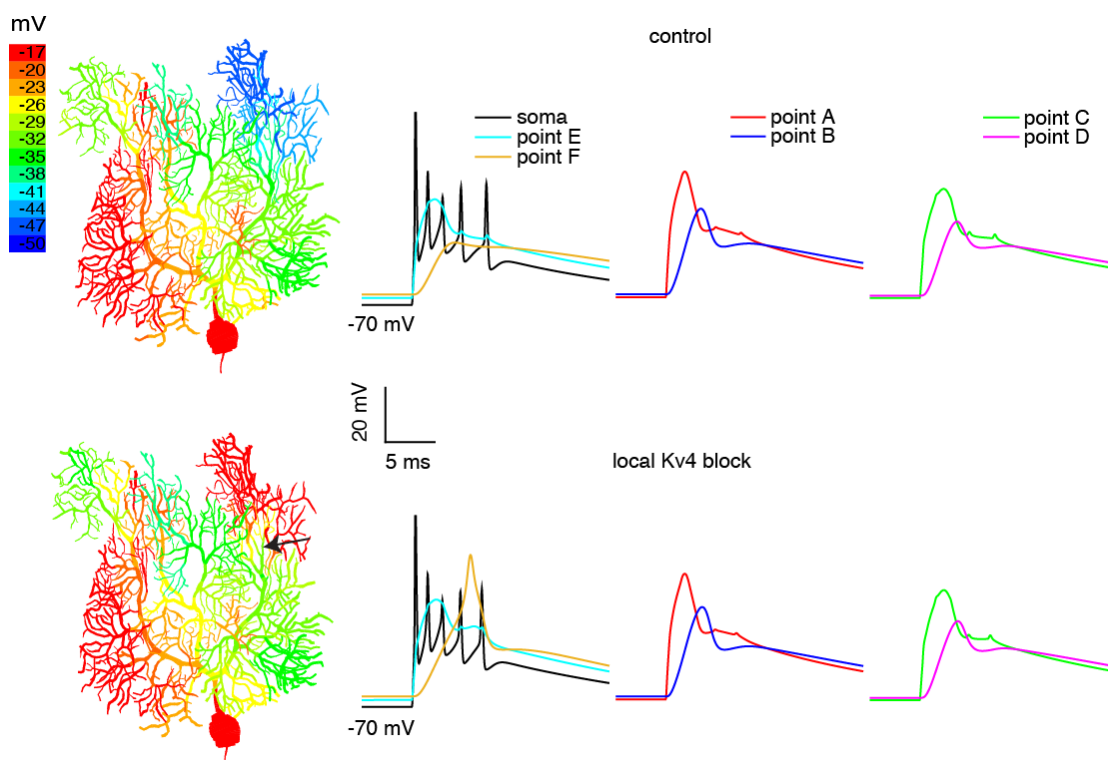

787  
788  
789  
790  
791  
792  
793

**Figure S8. Local Kv4 block modulates dendritic responses in a spatially precise manner. Related to Figure 6.**

In the child branchlet of the labeled dendritic section, Kv4 current is blocked (bottom panel). Only the dendritic responses located within the labeled branchlet (For example, Point F) are facilitated by the local Kv4 block. In other parts of the dendrite, dendritic responses are not affected. The definition of recorded dendritic sites is the same as in Fig. 2.

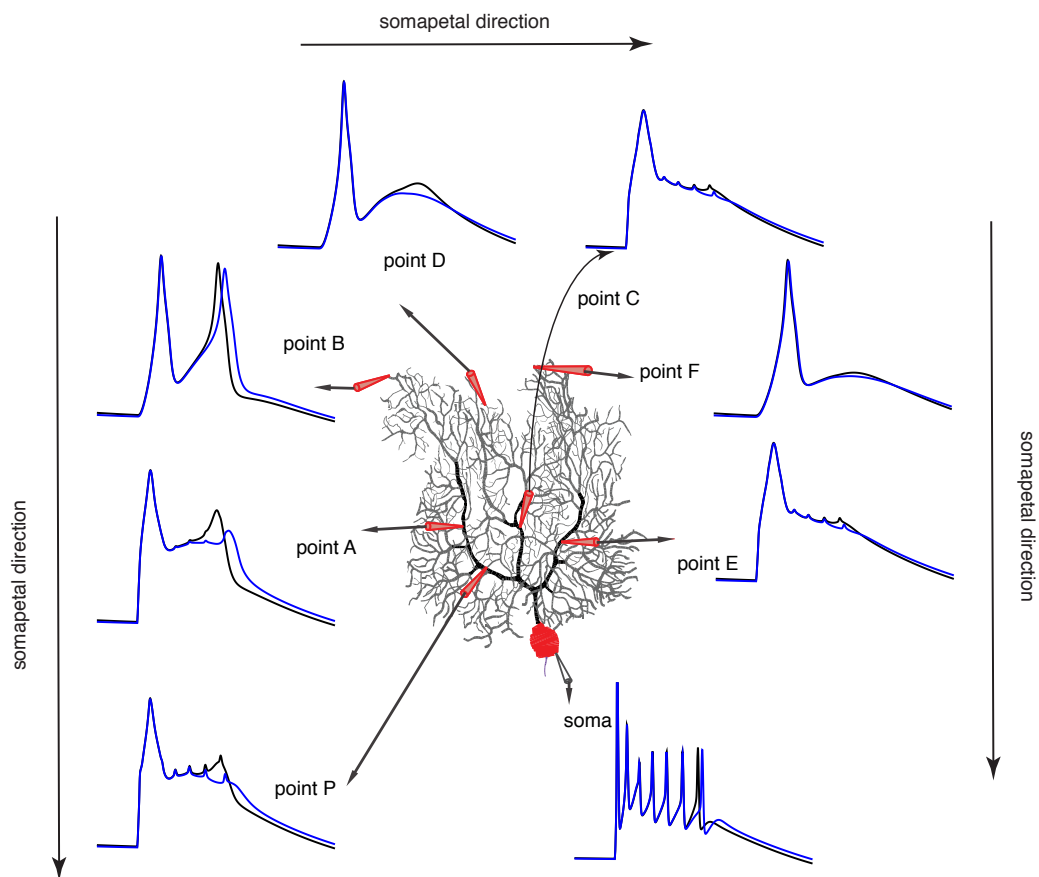

794

795 **Figure S9. The dendritic spike measured on the proximal smooth dendrite can't reflect dendritic**  
796 **responses in the rest of the dendrite. This figure supports our results in Fig.5 and Discussion.**

797 Here we reproduce the experiment by Davie et al. (2008). The holding current is -0.2 nA. The CF is  
798 activated at different phases of the somatic interspike interval to achieve a slight change of the dendritic  
799 membrane potential. In case I (blue traces), a secondary dendritic spikelet occurs at point B of the distal  
800 dendrite. However, at point A and P of the same branch (branch 1) closer to the soma, no secondary  
801 dendritic spikelets are triggered. With a slight depolarization of the dendrite in case II (black traces),  
802 secondary dendritic spikelets occur at both proximal sites (point A and point P) and at the distal site  
803 (point B).

804

## 805 **Supplementary Experimental Procedures**

### 806 **Current equations and calcium handling**

807 1) Na<sup>+</sup> current in the PC.

808 Na<sup>+</sup> current in the model is distributed in the AIS and soma. Na<sup>+</sup> current in the PC is  
809 composed of ‘transient’, ‘persistent’ and ‘resurgent’ components. We started from the  
810 previous model (Khaliq et al., 2003) and made slight changes (Narsg). In the soma, we  
811 adjusted the reaction rates between the I1 - I5 states by right shifting 5 mV (Yan et al.,  
812 2014):  $\alpha = 150 e^{(V-5)/20}$ ,  $\beta = 3 e^{(V-5)/-20}$ . Other parameters are the same as the  
813 original model. This adjustment mainly right-shifts the inactivation curve of this current  
814 by ~ 2.5 mV. The inactivation curve of the modified model lies within measurements  
815 (Raman and Bean, 2001; Yan et al., 2014). In the AIS, in addition to the above-  
816 mentioned adjustment, we also adjusted deactivation rates between C1 - C5 to lower  
817 the spike threshold in the AIS, as done by Colbert and Pan (2002). Therefore,  $\beta =$   
818  $3 e^{(V+15)/-15}$  for reaction rates between C1 - C5. First, by this adjustment, the  
819 contribution of AIS spikes to somatic spikes is closer to measured data (represented by  
820  $d^2V/dt^2$  in Fig. 1D). Second, we removed the frequently failed recovery of simple spikes  
821 after a complex spike when there is no obvious after-hyperpolarization following the  
822 complex spike (although this can be observed in some experiments, data shared by Paul  
823 Mathews from UCLA).

824 It is impossible to approximate Na<sup>+</sup> currents using a single model, given their multiple  
825 components. In the original model (Khaliq et al., 2003), the persistent component is  
826 tiny. Therefore, we incorporated an additional persistent Na<sup>+</sup> current model to  
827 compensate (NaP). The steady state activation curve is from Carter et al. (2012),  $m_{ss} =$   
828  $1/(1 + e^{-(V+66)/5})$ . The time constant is from Baker (2005),  $\tau_m = 1/(\alpha_m +$   
829  $\beta_m)$ ,  $\alpha_m = 1/(17.235/(1 + e^{(V+27.58)/-11.47}))$ ,  $\beta_m = 1/(17.235/(1 + e^{(V+86.2)/19.8}))$ .  
830 This persistent component helps to maintain spike firing during negative current  
831 injections.

832 2) H-current in the PC

833 H-current (I<sub>h</sub>) is distributed in the whole PC (Angelo et al., 2007). In our model, the  
834 formulations are the same as the model formulations from Angelo et al. (2007), except  
835 we shifted the activation curve to a more hyperpolarized direction by 6 mV to make  
836 ‘sag’ responses with different holding currents more comparable to experimental  
837 recordings (Fig. 1G).

838 3) T-type Ca<sup>2+</sup> current in the PC

839 T-type Ca<sup>2+</sup> current is distributed in the AIS (Bender and Trussell, 2009), the smooth  
840 dendrite and the spiny dendrite (Hildebrand et al., 2009; Otsu et al., 2014). The  
841 formulation of this current is according to data from Otsu et al. (2014).  $m_{ss} = 1/(1 +$   
842  $e^{-(V-35.606)/4.7})$ ,  $\tau_m = 1/(1.2757 + \alpha_m + \beta_m)$ ,  $\alpha_m = -2.3199/(1 +$   
843  $e^{(V+41.448)/-30.655})$ ,  $\beta_m = 2.5712/(1 + e^{(V+21.7866)/-9.6306})$ ,  $h_{ss} = 1/(1 +$   
844  $e^{(V+81.718)/6.4635})$ ,  $\tau_h = 1/(0.0076 + \alpha_h + \beta_h)$ ,  $\alpha_h = 0.17746/(1 +$   
845  $e^{(V+41.448)/-30.655})$ ,  $\beta_h = 0.13402/(1 + e^{(V+94.836)/-5.5845})$ . In the model, both BK  
846 and SK2 don’t sense Ca<sup>2+</sup> influx from T-type Ca<sup>2+</sup> channels.

847 4) P-type  $\text{Ca}^{2+}$  current in the PC

848 P-type  $\text{Ca}^{2+}$  current is distributed throughout the entire PC (Indriati et al., 2013). The  
849 formulation of this current is according to the data from Benton and Raman (2009).

850  $m_{ss} = 1/(1 + e^{-(V-25.5)/4.113})$ ,  $\tau_m = 0.2 + 0.7031e^{-((V+25)/14)^2}$ .

851 5)  $\text{Ca}^{2+}$  handling mechanism

852 In the dendrite, we used the formulation from Anwar et al. (2012) with 4 shells. In both  
853 soma and AIS, we made BK channels sense  $\text{Ca}^{2+}$  signals closer to the membrane surface  
854 (subspace) or  $\text{Ca}^{2+}$  channels by increasing the number of shells (Indriati et al., 2013).  
855 In the AIS, we still used the formulation as in Anwar et al. (2012), but we increased the  
856 number of shells to 10. In the soma, we used the fixed depth scheme for the outermost  
857 shell and 20 shells in total to reduce the computational load (Anwar et al., 2014). We  
858 also incorporated a sarcoplasmic endoplasmic reticulum  $\text{Ca}^{2+}$ ATPase (SERCA) pump  
859 to reduce the spike-over-spike  $\text{Ca}^{2+}$  summation in AIS and soma.  $J_{SERCA} = 0.1 *$   
860  $vol(i) * Ca[i]/(Ca[i] + 0.0058(mM))$ ,  $vol(i)$  means the volume of the  $i_{th}$  shell.  
861  $Ca[i]$  means the free  $\text{Ca}^{2+}$  concentration of the  $i_{th}$  shell.

862 6) BK current in the PC

863 We used the same formulation from Anwar et al. (2012) as the fast (or IBTX-sensitive)  
864 component of the BK current (Benton et al., 2013). We also incorporated the slow (or  
865 IBTX-insensitive) component of BK current (Benton et al., 2013) from Jaffe et al.  
866 (2011). The formulation of their type II model was used. The fast component is  
867 distributed in the whole PC and the slow component is only distributed in the soma and  
868 the AIS.

869 7) SK2 current in the PC

870 SK2 current is distributed in the whole PC (Belmeguenai et al., 2010; Swensen and  
871 Bean, 2003). We used the formulation from Solinas et al. (2007) according to the data  
872 by Hirschberg et al. (1998).

873 8) Kv3 current in the PC

874 KV3 current is distributed in the whole PC (Martina et al., 2003). The formulation is  
875 from Akemann et al. (2009) according to the data from Martina et al. (2007). In our  
876 model, the steady state activation curve is left shifted by 4 mV with  $V_{0.5} \approx 2$  mV, which  
877 is still within the experimental range (Martina et al., 2007; Martina et al., 2003; Zagha  
878 et al., 2010).

879 9) Kv4 current in the PC

880 In our model, Kv4 current has both fast and slow inactivation components and is  
881 distributed in the smooth and the spiny dendrites (Otsu et al., 2014). We took the steady  
882 state activation curve from Gunay et al. (2008). The inactivation curve and time  
883 constants are according to experimental data of Stéphane Dieudonné.  $m_{ss} = 1/(1 +$   
884  $e^{(V+49)/-12.5})$ ,  $\tau_m = 1/(\alpha_m + \beta_m)$ ,  $\alpha_m = 0.1342/(1 + e^{(V+60)/32.19976})$ ,  $\beta_m =$   
885  $0.15743/(1 + e^{(V+57)/37.51346})$ ,  $h_{ss} = 1/(1 + e^{(V+75.30348)/6.06329})$ ,  $\tau_{hf} = 1/$   
886  $(\alpha_{hf} + \beta_{hf})$ ,  $\alpha_{hf} = 0.01342/(1 + e^{(V+60)/7.86476})$ ,  $\beta_{hf} = 0.04477/(1 +$   
887  $e^{(V+54)/-11.6315})$ ,  $\tau_{hs} = 100$ .

888 10) Kv1 current in the PC

889 In our model, Kv1 is distributed in the dendrite (Khavandgar et al., 2005). The  
890 formulation is from Akemann and Knopfel (2006). We added an inactivation gate,

891 according to data from Otsu et al. (2014).  $h_{ss} = 1/(1 + e^{(V+66.16)/6.1881})$ . Due to the  
892 slow inactivation process, the inactivation time constant was set to be 1000 ms.

### 893 **Parameter tuning**

894 The model was hand-tuned because extensive preceding efforts using automatic  
895 parameter searching did not achieve good results (Achard and De Schutter, 2006; Van  
896 Geit et al., 2007). Due to technical limitations, we can only get simultaneous somatic  
897 and dendritic patch-clamp recordings (single dendritic site) to constrain the model in  
898 most cases. However, it has been demonstrated that data recorded from just two  
899 locations in the same L5 pyramidal neuron are insufficient to accurately constrain a  
900 compartmental model (Keren et al., 2005). For the PC, we were able to get good F-I  
901 curves and ‘sag’ responses with automated search methods, but the dendrite model  
902 could not generate physiologic responses. This is because we don’t have sufficient data  
903 to constrain the active properties of the dendrite and the interaction between soma and  
904 dendrite by automatic parameter searching. Therefore, we decided to use hand-tuning  
905 instead, and we tried to incorporate as many experimental observations as possible into  
906 the model. After repeated modification over a period of more than two years, we  
907 achieved the present model.

#### 908 1) Currents in the soma

909 The  $\text{Na}^+$  current profile nearly coincides with the total net ionic current during the  
910 depolarization phase of dissociated PC AP-clamp recordings (Carter and Bean, 2009).  
911 The total net ionic current is calculated by  $-C \cdot dV/dt$ , where  $C$  is the cell capacitance  
912 and  $dV/dt$  is the time derivative of the voltage. The results of Carter and Bean suggest  
913 that  $\text{Na}^+$  current is nearly the sole current supporting the depolarization and  $\text{K}^+$  currents  
914 are not activated during the depolarization phase (as illustrated in Fig. 2 of their paper).  
915 This also agrees with the high activation threshold of  $\text{K}^+$  currents in the PC (Martina et  
916 al., 2007). This finding provided an opportunity to firmly constrain the somatic ionic  
917 currents. The measured peak  $\text{Na}^+$  current amplitude is 12.5 nA in dissociated mouse  
918 PCs with a capacitance of 12 pF, but the ratio of current/capacitance in the soma may  
919 be underestimated due to the possible remaining stump of the dendritic tree. In our  
920 model, we have a peak somatic  $\text{Na}^+$  current of 17 nA relative to a capacitance of 10.5  
921 pF in the soma. Then we get the conductance density of somatic  $\text{Kv3}$  current by  
922 constraining the spike half-amplitude duration (0.15 ms) close to experimental  
923 measurements (0.17 ms, we also gave consideration to the spike duration in the intact  
924 PC as shown in Fig. 1B). The high activation threshold of the  $\text{Kv3}$  current makes it  
925 active mainly during the repolarization phase (Carter and Bean, 2009) and constrains  
926 the spike duration (Martina et al., 2007). Subsequently, we constrained the conductance  
927 density of P-type  $\text{Ca}^{2+}$  current and BK current to have an AHP (-77 mV) comparable  
928 to the recorded (-82 mV, still we also considered the AHP in the intact PC  $\sim$  -70 mV).  
929 The conductance density of P-type  $\text{Ca}^{2+}$  is constrained to be the same as that in the  
930 smooth dendrite. Then only SK2 and  $\text{I}_h$  remained unconstrained for the somatic ionic  
931 currents. We initially assigned tentative conductance density values for these two  
932 currents to develop a firing somata model (like the previous Kaliq-Raman model  
933 (Khaliq et al., 2003)). To reflect the negligible role of  $\text{I}_h$  in dissociated PC firing  
934 (Raman and Bean, 1999), the conductance density of  $\text{I}_h$  is half of that in smooth  
935 dendrite. In the intact PC, the conductance density of somatic SK2 current is adjusted  
936 to get a F-I curve close to the experimental measurements (Fig. 1G). The persistent  
937 component of  $\text{Na}^+$  current is constrained so that the intact PC still fires with -0.17 nA



938 somatic holding current, but it stops firing when the current amplitude changes to -0.36  
939 nA.

## 940 2) Currents in the AIS

941 We constrained ionic currents in the AIS to make the model behave like experimental  
942 data in two aspects: the axosomatic delay of the simple spike (Fig. 1B) and the second  
943 derivative of the simple spike (Fig. 1D). The first reflects how the spike in the AIS  
944 precedes the somatic spike and the second reflects the contribution of the spike in the  
945 AIS to the somatic spike. We assumed the conductance densities of  $I_h$  in AIS are the  
946 same as in soma.

## 947 3) Currents in the dendrite

948 Due to the limited quantitative data, ionic currents in the dendrite are more difficult to  
949 constrain compared with somatic currents. We first constrained the P-type  $Ca^{2+}$  current  
950 in the dendrite. In the spiny dendrite,  $Ca^{2+}$  influx during one dendritic spikelet is  $1.3e-$   
951  $14 C/\mu m^3$  in our model, which is close to the experimentally estimated  $1.1e-14 C/\mu m^3$   
952 (Otsu et al., 2014). The CF-evoked  $Ca^{2+}$  influx increases with distance from soma when  
953 a  $Ca^{2+}$ -supported dendritic spike occurs (Kitamura and Hausser, 2011; Otsu et al., 2014).  
954 Therefore, in the smooth dendrite, the current density was constrained to have a calcium  
955 influx ratio (smooth dendrite relative to the spiny dendrite at same membrane surface  
956 area) of 0.36. The conductance densities of P-type  $Ca^{2+}$  current are further supported  
957 by the time to peak of the first dendritic spikelet being  $\sim 1.5$  ms in the smooth dendrite  
958 (Davie et al., 2008; Kitamura and Hausser, 2011). Conductance densities of Kv4 current  
959 are assumed to be homogeneously distributed and then repeatedly adjusted to make this  
960 current able to ‘brake’ the dendritic spikes at low voltage ranges. We distributed more  
961 T-type  $Ca^{2+}$  channels (Hildebrand et al., 2009) in the spiny dendrite given they are  
962 preferentially distributed on spines. This current helps to offset the window current of  
963 Kv4 current to maintain the dendritic interspike interval membrane potential. We  
964 distributed larger conductance densities of BK current on the smooth dendrite  
965 compared to on spiny dendrite, given the BK channel clusters are mainly distributed on  
966 the soma and smooth dendrite (Kaufmann et al., 2010). BK current contributes to  
967 reasonable AHP after complex spikes as found in Davie et al. (2008).  $I_h$  is constrained  
968 to get a ‘sag’ response close to the experimental recordings (Fig. 1G). Kv1 and SK2  
969 help to regulate dendritic excitability to stop the occurrence of  $Na^+-Ca^{2+}$  bursting at low  
970 current injections. In our model, as with most cell recordings in rat PCs,  $Na^+-Ca^{2+}$  bursts  
971 begin to occur with 1.25 nA somatic current injection. In addition, this dendrite model  
972 can replicate the distance-dependent decay of the simple spike amplitude (Fig. 1E), the  
973 regulatory role of  $K^+$  currents in voltage-dependent dendritic spike generation and  
974 propagation (Fig. 3, S2-S4, S7), the dendritic voltage response waveforms at different  
975 conditions (Fig. S6), and peak dendritic voltage response propagation with distance  
976 from the soma at specific condition (Fig. 3G).

977

## 978 **Current conductance densities in different parts of the PC model**

979

| Currents<br>(nS/cm <sup>2</sup> ) | AIS     | soma    | smooth<br>dendrite | spiny dendrite |
|-----------------------------------|---------|---------|--------------------|----------------|
| Narsg                             | 0.56    | 0.0317  | 0                  | 0              |
| NaP                               | 0.0023  | 1.4e-4  | 0                  | 0              |
| $I_h$                             | 1.08e-4 | 1.08e-4 | 2.16e-4            | 3.24e-4        |
| T-type $Ca^{2+}$                  | 1.28e-4 | 0       | 2.7e-5             | 1.08e-4        |

|                         |        |        |         |        |
|-------------------------|--------|--------|---------|--------|
| P-type Ca <sup>2+</sup> | 1.05   | 1.9e-4 | 1.9e-4  | 7.6e-4 |
| BKfast                  | 6      | 0.8736 | 0.21    | 0.0448 |
| BKslow                  | 1.05   | 0.3    | 0       | 0      |
| SK2                     | 0.0278 | 0.0075 | 2.16e-4 | 3.6e-4 |
| Kv3                     | 115    | 1.8    | 0.1512  | 0.2268 |
| Kv4                     | 0      | 0      | 0.015   | 0.015  |
| Kv1                     | 0      | 0      | 0.002   | 0.001  |

980

981

## 982 **Supplementary References**

983

984 Achard, P., and De Schutter, E. (2006). Complex parameter landscape for a  
985 complex neuron model. *PLoS computational biology* 2, e94.

986 Akemann, W., and Knopfel, T. (2006). Interaction of Kv3 potassium channels and  
987 resurgent sodium current influences the rate of spontaneous firing of Purkinje  
988 neurons. *The Journal of neuroscience : the official journal of the Society for*  
989 *Neuroscience* 26, 4602-4612.

990 Akemann, W., Lundby, A., Mutoh, H., and Knopfel, T. (2009). Effect of voltage  
991 sensitive fluorescent proteins on neuronal excitability. *Biophysical journal* 96,  
992 3959-3976.

993 Angelo, K., London, M., Christensen, S.R., and Hausser, M. (2007). Local and global  
994 effects of I(h) distribution in dendrites of mammalian neurons. *The Journal of*  
995 *neuroscience : the official journal of the Society for Neuroscience* 27, 8643-8653.

996 Anwar, H., Hong, S., and De Schutter, E. (2012). Controlling Ca<sup>2+</sup>-activated K<sup>+</sup>  
997 channels with models of Ca<sup>2+</sup> buffering in Purkinje cells. *Cerebellum* 11, 681-693.

998 Anwar, H., Roome, C.J., Nedelescu, H., Chen, W., Kuhn, B., and De Schutter, E. (2014).  
999 Dendritic diameters affect the spatial variability of intracellular calcium dynamics  
1000 in computer models. *Front Cell Neurosci* 8, 168.

1001 Baker, M.D. (2005). Protein kinase C mediates up-regulation of tetrodotoxin-  
1002 resistant, persistent Na<sup>+</sup> current in rat and mouse sensory neurones. *The Journal*  
1003 *of physiology* 567, 851-867.

1004 Belmeguenai, A., Hosy, E., Bengtsson, F., Pedroarena, C.M., Piochon, C., Teuling, E.,  
1005 He, Q., Ohtsuki, G., De Jeu, M.T., Elgersma, Y., *et al.* (2010). Intrinsic plasticity  
1006 complements long-term potentiation in parallel fiber input gain control in  
1007 cerebellar Purkinje cells. *The Journal of neuroscience : the official journal of the*  
1008 *Society for Neuroscience* 30, 13630-13643.

1009 Bender, K.J., and Trussell, L.O. (2009). Axon initial segment Ca<sup>2+</sup> channels  
1010 influence action potential generation and timing. *Neuron* 61, 259-271.

1011 Benton, M.D., Lewis, A.H., Bant, J.S., and Raman, I.M. (2013). Iberiotoxin-sensitive  
1012 and -insensitive BK currents in Purkinje neuron somata. *Journal of*  
1013 *neurophysiology* 109, 2528-2541.

1014 Benton, M.D., and Raman, I.M. (2009). Stabilization of Ca current in Purkinje  
1015 neurons during high-frequency firing by a balance of Ca-dependent facilitation  
1016 and inactivation. *Channels* 3, 393-401.

1017 Carter, B.C., and Bean, B.P. (2009). Sodium entry during action potentials of  
1018 mammalian neurons: incomplete inactivation and reduced metabolic efficiency in  
1019 fast-spiking neurons. *Neuron* 64, 898-909.

1020 Carter, B.C., Giessel, A.J., Sabatini, B.L., and Bean, B.P. (2012). Transient Sodium  
1021 Current at Subthreshold Voltages: Activation by EPSP Waveforms. *Neuron* 75,  
1022 1081-1093.

1023 Colbert, C.M., and Pan, E. (2002). Ion channel properties underlying axonal action  
1024 potential initiation in pyramidal neurons. *Nature neuroscience* 5, 533-538.

1025 Davie, J.T., Clark, B.A., and Hausser, M. (2008). The origin of the complex spike in  
1026 cerebellar Purkinje cells. *The Journal of neuroscience : the official journal of the*  
1027 *Society for Neuroscience* 28, 7599-7609.

1028 Gunay, C., Edgerton, J.R., and Jaeger, D. (2008). Channel density distributions  
1029 explain spiking variability in the globus pallidus: a combined physiology and  
1030 computer simulation database approach. *The Journal of neuroscience : the official*  
1031 *journal of the Society for Neuroscience* 28, 7476-7491.

1032 Hildebrand, M.E., Isope, P., Miyazaki, T., Nakaya, T., Garcia, E., Feltz, A., Schneider,  
1033 T., Hescheler, J., Kano, M., Sakimura, K., *et al.* (2009). Functional Coupling between  
1034 mGluR1 and Ca(v)3.1 T-Type Calcium Channels Contributes to Parallel Fiber-  
1035 Induced Fast Calcium Signaling within Purkinje Cell Dendritic Spines. *Journal of*  
1036 *Neuroscience* 29, 9668-9682.

1037 Hirschberg, B., Maylie, J., Adelman, J.P., and Marrion, N.V. (1998). Gating of  
1038 recombinant small-conductance Ca-activated K<sup>+</sup> channels by calcium. *The Journal*  
1039 *of general physiology* 111, 565-581.

1040 Indriati, D.W., Kamasawa, N., Matsui, K., Meredith, A.L., Watanabe, M., and  
1041 Shigemoto, R. (2013). Quantitative localization of Cav2.1 (P/Q-type) voltage-  
1042 dependent calcium channels in Purkinje cells: somatodendritic gradient and  
1043 distinct somatic coclustering with calcium-activated potassium channels. *The*  
1044 *Journal of neuroscience : the official journal of the Society for Neuroscience* 33,  
1045 3668-3678.

1046 Jaffe, D.B., Wang, B., and Brenner, R. (2011). Shaping of action potentials by type I  
1047 and type II large-conductance Ca(2)<sup>+</sup>-activated K<sup>+</sup> channels. *Neuroscience* 192,  
1048 205-218.

1049 Kaufmann, W.A., Kasugai, Y., Ferraguti, F., and Storm, J.F. (2010). Two distinct  
1050 pools of large-conductance calcium-activated potassium channels in the somatic  
1051 plasma membrane of central principal neurons. *Neuroscience* 169, 974-986.

1052 Keren, N., Peled, N., and Korngreen, A. (2005). Constraining compartmental  
1053 models using multiple voltage recordings and genetic algorithms. *Journal of*  
1054 *neurophysiology* 94, 3730-3742.

1055 Khaliq, Z.M., Gouwens, N.W., and Raman, I.M. (2003). The contribution of  
1056 resurgent sodium current to high-frequency firing in Purkinje neurons: an  
1057 experimental and modeling study. *The Journal of neuroscience : the official journal*  
1058 *of the Society for Neuroscience* 23, 4899-4912.

1059 Khavandgar, S., Walter, J.T., Sageser, K., and Khodakhah, K. (2005). Kv1 channels  
1060 selectively prevent dendritic hyperexcitability in rat Purkinje cells. *The Journal of*  
1061 *physiology* 569, 545-557.

1062 Kitamura, K., and Hausser, M. (2011). Dendritic calcium signaling triggered by  
1063 spontaneous and sensory-evoked climbing fiber input to cerebellar Purkinje cells  
1064 in vivo. *The Journal of neuroscience : the official journal of the Society for*  
1065 *Neuroscience* 31, 10847-10858.

1066 Martina, M., Metz, A.E., and Bean, B.P. (2007). Voltage-dependent potassium  
1067 currents during fast spikes of rat cerebellar Purkinje neurons: inhibition by BDS-I  
1068 toxin. *Journal of neurophysiology* 97, 563-571.

1069 Martina, M., Yao, G.L., and Bean, B.P. (2003). Properties and functional role of  
1070 voltage-dependent potassium channels in dendrites of rat cerebellar Purkinje  
1071 neurons. *The Journal of neuroscience : the official journal of the Society for*  
1072 *Neuroscience* *23*, 5698-5707.

1073 Otsu, Y., Marcaggi, P., Feltz, A., Isope, P., Kollo, M., Nusser, Z., Mathieu, B., Kano, M.,  
1074 Tsujita, M., Sakimura, K., *et al.* (2014). Activity-dependent gating of calcium spikes  
1075 by A-type K<sup>+</sup> channels controls climbing fiber signaling in Purkinje cell dendrites.  
1076 *Neuron* *84*, 137-151.

1077 Raman, I.M., and Bean, B.P. (1999). Ionic currents underlying spontaneous action  
1078 potentials in isolated cerebellar Purkinje neurons. *The Journal of neuroscience :*  
1079 *the official journal of the Society for Neuroscience* *19*, 1663-1674.

1080 Raman, I.M., and Bean, B.P. (2001). Inactivation and recovery of sodium currents  
1081 in cerebellar Purkinje neurons: evidence for two mechanisms. *Biophysical journal*  
1082 *80*, 729-737.

1083 Solinas, S., Forti, L., Cesana, E., Mapelli, J., De Schutter, E., and D'Angelo, E. (2007).  
1084 Computational reconstruction of pacemaking and intrinsic electroresponsiveness  
1085 in cerebellar Golgi cells. *Front Cell Neurosci* *1*, 2.

1086 Swensen, A.M., and Bean, B.P. (2003). Ionic mechanisms of burst firing in  
1087 dissociated Purkinje neurons. *The Journal of neuroscience : the official journal of*  
1088 *the Society for Neuroscience* *23*, 9650-9663.

1089 Van Geit, W., Achard, P., and De Schutter, E. (2007). Neurofitter: a parameter  
1090 tuning package for a wide range of electrophysiological neuron models. *Frontiers*  
1091 *in neuroinformatics* *1*, 1.

1092 Yan, H., Pablo, J.L., Wang, C., and Pitt, G.S. (2014). FGF14 modulates resurgent  
1093 sodium current in mouse cerebellar Purkinje neurons. *eLife* *3*, e04193.

1094 Zagha, E., Manita, S., Ross, W.N., and Rudy, B. (2010). Dendritic Kv3.3 potassium  
1095 channels in cerebellar purkinje cells regulate generation and spatial dynamics of  
1096 dendritic Ca<sup>2+</sup> spikes. *Journal of neurophysiology* *103*, 3516-3525.

1097
